# Supplementary material for: Why is the giant panda black and white?
Source: Oxford University Press journal article supplement (doi:10.1093/beheco/arx008), 2017-01-30

Supplementary Table S1. Sources of photographs.

| **Carnivore Sides** | | |
| --- | --- | --- |
| **Species Common Name** | **Photo** | **Source** |
| Red panda | Ailurus fulgens 10 | Wikimedia |
| Red panda | Ailurus fulgens 11 | Wikimedia |
| Red panda | Ailurus fulgens 12 | Flickr |
| Red panda | Ailurus fulgens 5 | Flickr |
| Red panda | Ailurus fulgens 6 | http://www.leiweb.it/casa/animali-natura/2012/gallery/img/02/panda.jpg |
| Red panda | Ailurus fulgens 7 | http://1.bp.blogspot.com/-T1rJxHfYpEc/T7gHK834uWI/AAAAAAAAGM8/q4-FVeouN-0/s640/Imagen+145.jpg, |
| Red panda | Ailurus fulgens 8 | http://www.natur-server.de/Bilder/MZ/000/sm000031-panda.jpg, |
| Red panda | Ailurus fulgens 9 | Wikimedia |
| Red panda | Ailurus fulgens fulgens 1 | Nature Picture Library |
| Red panda | Ailurus fulgens fulgens 2 | Nature Picture Library |
| Red panda | Ailurus fulgens fulgens 3 | Getty Images |
| Red panda | Ailurus fulgens fulgens 4 | Getty Images |
| Short-eared dog | Atelocynus microtis 1 | Arkive |
| Short-eared dog | Atelocynus microtis 2 | Arkive |
| Short-eared dog | Atelocynus microtis 3 | Science Photo Library |
| Short-eared dog | Atelocynus microtis 4 | Carnivora Forum |
| Short-eared dog | Atelocynus microtis 5 | Carnivora Forum |
| Side-striped jackal | Canis adustus 1 | Arkive |
| Side-striped jackal | Canis adustus 2 | Arkive |
| Side-striped jackal | Canis adustus 3 | Arkive |
| Side-striped jackal | Canis adustus 4 | Nature Picture Library |
| Side-striped jackal | Canis adustus 5 | Nature Picture Library |
| Side-striped jackal | Canis adustus 6 | Flickr |
| Golden jackal | Canis aureus 1 | Nature Picture Library |
| Golden jackal | Canis aureus 14 | Nature Picture Library |
| Golden jackal | Canis aureus 15 | Nature Picture Library |
| Golden jackal | Canis aureus 2 | Nature Picture Library |
| Golden jackal | Canis aureus 3 | Nature Picture Library |
| Golden jackal | Canis aureus 4 | Nature Picture Library |
| Golden jackal | Canis aureus 5 | Nature Picture Library |
| Golden jackal | Canis aureus 6 | Arkive |
| Golden jackal | Canis aureus 7 | Arkive |
| Golden jackal | Canis aureus bea 10 | Encyclopedia of Life |
| Golden jackal | Canis aureus indicus 11 | Encyclopedia of Life |
| Golden jackal | Canis aureus naria 12 | Encyclopedia of Life |
| Golden jackal | Canis aureus naria 8 | BioLib |
| Golden jackal | Canis aureus naria 9 | BioLib |
| Coyote | Canis latrans 1 | Arkive |
| Coyote | Canis latrans 10 | Flickr |
| Coyote | Canis latrans 11 | Nature Picture Library |
| Coyote | Canis latrans 2 | Nature Picture Library |
| Coyote | Canis latrans 3 | Nature Picture Library |
| Coyote | Canis latrans 4 | Nature Picture Library |
| Coyote | Canis latrans 5 | Nature Picture Library |
| Coyote | Canis latrans 6 | Nature Picture Library |
| Coyote | Canis latrans 7 | Nature Picture Library |
| Coyote | Canis latrans 8 | Nature Picture Library |
| Coyote | Canis latrans 9 | Flickr |
| Grey wolf | Canis lupus 5 | Biolib |
| Grey wolf | Canis lupus 6 | Nature Picture Library |
| Grey wolf | Canis lupus 7 | Nature Picture Library |
| Grey wolf | Canis lupus 8 | Nature Picture Library |
| Grey wolf | Canis lupus 9 | Nature Picture Library |
| Grey wolf | Canis lupus alaska 3 | Nature Picture Library |
| Grey wolf | Canis lupus arabs 1 | Nature Picture Library |
| Grey wolf | Canis lupus crassodon 2 | Nature Picture Library |
| Grey wolf | Canis lupus lupus 4 | BioLib |
| Grey wolf | Canis lupus signatus 10 | Biolib |
| Black-backed jackal | Canis mesomelas 1 | Nature Picture Library |
| Black-backed jackal | Canis mesomelas 10 | Encyclopedia of Life |
| Black-backed jackal | Canis mesomelas 11 | Encyclopedia of Life |
| Black-backed jackal | Canis mesomelas 12 | Encyclopedia of Life |
| Black-backed jackal | Canis mesomelas 2 | Nature Picture Library |
| Black-backed jackal | Canis mesomelas 3 | Nature Picture Library |
| Black-backed jackal | Canis mesomelas 4 | Nature Picture Library |
| Black-backed jackal | Canis mesomelas 5 | Nature Picture Library |
| Black-backed jackal | Canis mesomelas 6 | Nature Picture Library |
| Black-backed jackal | Canis mesomelas 7 | Nature Picture Library |
| Black-backed jackal | Canis mesomelas 8 | Encyclopedia of Life |
| Black-backed jackal | Canis mesomelas 9 | Encyclopedia of Life |
| Red wolf | Canis lupus rufus 1 | Arkive |
| Red wolf | Canis lupus rufus 2 | Arkive |
| Red wolf | Canis lupus rufus 3 | Nature Picture Library |
| Red wolf | Canis lupus rufus 4 | Nature Picture Library |
| Red wolf | Canis lupus rufus 5 | Nature Picture Library |
| Red wolf | Canis lupus rufus 6 | Nature Picture Library |
| Ethiopian wolf/Simian jackal | Canis simensis 1 | Nature Picture Library |
| Ethiopian wolf/Simian jackal | Canis simensis 10 | Flickr |
| Ethiopian wolf/Simian jackal | Canis simensis 11 | Flickr |
| Ethiopian wolf/Simian jackal | Canis simensis 12 | BioLib |
| Ethiopian wolf/Simian jackal | Canis simensis 2 | Nature Picture Library |
| Ethiopian wolf/Simian jackal | Canis simensis 3 (LEFT) | Nature Picture Library |
| Ethiopian wolf/Simian jackal | Canis simensis 4 | Nature Picture Library |
| Ethiopian wolf/Simian jackal | Canis simensis 5 | Nature Picture Library |
| Ethiopian wolf/Simian jackal | Canis simensis 6 | Nature Picture Library |
| Ethiopian wolf/Simian jackal | Canis simensis 7 | Flickr |
| Ethiopian wolf/Simian jackal | Canis simensis 8 | Flickr |
| Ethiopian wolf/Simian jackal | Canis simensis 9 | Flickr |
| Maned wolf | Chrysocyon brachyurus 1 | Nature Picture Library |
| Maned wolf | Chrysocyon brachyurus 10 | Flickr |
| Maned wolf | Chrysocyon brachyurus 11 | Wikimedia |
| Maned wolf | Chrysocyon brachyurus 2 | Nature Picture Library |
| Maned wolf | Chrysocyon brachyurus 3 | Mammal Image Library |
| Maned wolf | Chrysocyon brachyurus 4 | Flickr |
| Maned wolf | Chrysocyon brachyurus 5 | Flickr |
| Maned wolf | Chrysocyon brachyurus 6 | Nature Picture Library |
| Maned wolf | Chrysocyon brachyurus 7 | Encyclopedia of Life |
| Maned wolf | Chrysocyon brachyurus 8 | Flickr |
| Dhole | Cuon alpinus 1 | Nature Picture Library |
| Dhole | Cuon alpinus 10 | Flickr |
| Dhole | Cuon alpinus 2 | Nature Picture Library |
| Dhole | Cuon alpinus 3 | Nature Picture Library |
| Dhole | Cuon alpinus 4 | Nature Picture Library |
| Dhole | Cuon alpinus 5 | Nature Picture Library |
| Dhole | Cuon alpinus 6 | Nature Picture Library |
| Dhole | Cuon alpinus 7 | Nature Picture Library |
| Dhole | Cuon alpinus 8 | Nature Picture Library |
| Dhole | Cuon alpinus 9 | BioLib |
| Culpeo | Lycalopex culpaeus 1 | Nature Picture Library |
| Culpeo | Lycalopex culpaeus 10 | Flickr |
| Culpeo | Lycalopex culpaeus 11 | Flickr |
| Culpeo | Lycalopex culpaeus 2 | Nature Picture Library |
| Culpeo | Lycalopex culpaeus 3 | BioLib |
| Culpeo | Lycalopex culpaeus 4 | BioLib |
| Culpeo | Lycalopex culpaeus 5 | Animals and Earth |
| Culpeo | Lycalopex culpaeus 6 | Flickr |
| Culpeo | Lycalopex culpaeus 7 | Flickr |
| Culpeo | Lycalopex culpaeus 8 | Flickr |
| Culpeo | Lycalopex culpaeus 9 | Flickr |
| Darwin's fox | Lycalopex fulvipes 1 | Flickr |
| Darwin's fox | Lycalopex fulvipes 2 | Nature Picture Library |
| Darwin's fox | Lycalopex fulvipes 3 | Flickr |
| Darwin's fox | Lycalopex fulvipes 4 | Flickr |
| South American gray fox | Lycalopex griseus 1 | Animals and Earth |
| South American gray fox | Lycalopex griseus 2 | Nature Picture Library |
| South American gray fox | Lycalopex griseus 3 | Nature Picture Library |
| South American gray fox | Lycalopex griseus 5 | Encyclopedia of Life |
| South American gray fox | Lycalopex griseus 6 | Encyclopedia of Life |
| South American gray fox | Lycalopex griseus 7 | Nature Picture Library |
| Pampas fox | Lycalopex gymnocercus 1 | Nature Picture Library |
| Pampas fox | Lycalopex gymnocercus 2 | Arkive |
| Pampas fox | Lycalopex gymnocercus 3 | Carnivora Forum |
| Pampas fox | Lycalopex gymnocercus 4 | Carnivora Forum |
| Pampas fox | Lycalopex gymnocercus 5 | Carnivora Forum |
| Sechuran fox | Lycalopex sechurae 1 | Nature Picture Library |
| Sechuran fox | Lycalopex sechurae 2 | Animals and Earth |
| Hoary Fox | Lycalopex vetulus 1 | http://www.procarnivoros.org.br/arquivos/fotosa/33/20100105_094501.jpg |
| Hoary Fox | Lycalopex vetulus 2 | Flickr |
| African wild dog | Lycaon pictus 1 | Nature Picture Library |
| African wild dog | Lycaon pictus 10 | Nature Picture Library |
| African wild dog | Lycaon pictus 11 | Nature Picture Library |
| African wild dog | Lycaon pictus 12 | Flickr |
| African wild dog | Lycaon pictus 2 | Nature Picture Library |
| African wild dog | Lycaon pictus 3 | Nature Picture Library |
| African wild dog | Lycaon pictus 4 (FRONT) | Nature Picture Library |
| African wild dog | Lycaon pictus 5 | Nature Picture Library |
| African wild dog | Lycaon pictus 6 | Mammal Image Library |
| African wild dog | Lycaon pictus 7 | Nature Picture Library |
| African wild dog | Lycaon pictus 9 | Nature Picture Library |
| Raccoon dog | Nyctereutes procyonoides 1 | http://www.all-creatures.org/anex/raccdog-01.jpg |
| Raccoon dog | Nyctereutes procyonoides 2 | http://www.zooclub.ru/fotogal/oboi/hish/73a.shtml |
| Raccoon dog | Nyctereutes procyonoides 3 | http://kherson-news.net/khersonskie-problemi/item/1943-enotovidnaja-sobaka-perepugala-hersonskih-dachnikov.html  http://www.homeo.su/apteca/foto/Enotovidnaya_sobaka_Nyctereutes_.jpg |
| Raccoon dog | Nyctereutes procyonoides 4 | Arkive |
| Raccoon dog | Nyctereutes procyonoides 5 | Arkive |
| Raccoon dog | Nyctereutes procyonoides 6 (LOWER) | Arkive |
| Raccoon dog | Nyctereutes procyonoides 7 | Nature Picture Library |
| Raccoon dog | Nyctereutes procyonoides 8 | Flickr |
| Raccoon dog | Nyctereutes procyonoides 9 | Flickr |
| Bat-eared fox | Otocyon megalotis 1 | http://calphotos.berkeley.edu/imgs/512x768/0000_0000/1006/0748.jpeg |
| Bat-eared fox | Otocyon megalotis 10 | Flickr |
| Bat-eared fox | Otocyon megalotis 2 | http://www.istockphoto.com/photos/bat-eared+fox?facets=%7B%22text%22:%5B%22bat-eared%20fox%22%5D,%22pageNumber%22:1,%22perPage%22:100,%22abstractType%22:%5B%22photos%22%5D,%22order%22:%22bestMatch%22,%22f%22:true%7D |
| Bat-eared fox | Otocyon megalotis 3 | BioLib |
| Bat-eared fox | Otocyon megalotis 4 | Encyclopedia of Life |
| Bat-eared fox | Otocyon megalotis 5 | Nature Picture Library |
| Bat-eared fox | Otocyon megalotis 6 | Nature Picture Library |
| Bat-eared fox | Otocyon megalotis 7 | Nature Picture Library |
| Bat-eared fox | Otocyon megalotis 8 | Encyclopedia of Life |
| Bat-eared fox | Otocyon megalotis 9 | Flickr |
| Bush dog | Speothos venaticus 1 | Arkive |
| Bush dog | Speothos venaticus 10 | Encyclopedia of Life |
| Bush dog | Speothos venaticus 11 | BioLib |
| Bush dog | Speothos venaticus 12 | BioLib |
| Bush dog | Speothos venaticus 2 | Arkive |
| Bush dog | Speothos venaticus 3 | Arkive |
| Bush dog | Speothos venaticus 4 | Mammal Image Library |
| Bush dog | Speothos venaticus 5 | Nature Picture Library |
| Bush dog | Speothos venaticus 6 | Nature Picture Library |
| Bush dog | Speothos venaticus 7 | Encyclopedia of Life |
| Bush dog | Speothos venaticus 8 | Encyclopedia of Life |
| Bush dog | Speothos venaticus 9 | Encyclopedia of Life |
| Grey fox | Urocyon cinereoargenteus 1 | Arkive |
| Grey fox | Urocyon cinereoargenteus 10 | Wikimedia Commons |
| Grey fox | Urocyon cinereoargenteus 2 | Nature Picture Library |
| Grey fox | Urocyon cinereoargenteus 3 | Nature Picture Library |
| Grey fox | Urocyon cinereoargenteus 4 | Nature Picture Library |
| Grey fox | Urocyon cinereoargenteus 5 | Nature Picture Library |
| Grey fox | Urocyon cinereoargenteus 6 | Wikimedia Commons |
| Grey fox | Urocyon cinereoargenteus 7 | Encyclopedia of Life |
| Grey fox | Urocyon cinereoargenteus 8 | Encyclopedia of Life |
| Grey fox | Urocyon cinereoargenteus 9 | Encyclopedia of Life |
| Island fox | Urocyon littoralis 1 | http://www.catalinaconservancy.org/userfiles/images/wildlife/Conservation/Copy%20of |
| Island fox | Urocyon littoralis 2 | Arkive |
| Island fox | Urocyon littoralis 3 | Arkive |
| Island fox | Urocyon littoralis 4 | Encyclopedia of Life |
| Island fox | Urocyon littoralis 5 | Flickr |
| Island fox | Urocyon littoralis 6 | Flickr |
| Island fox | Urocyon littoralis 7 | Flickr |
| Island fox | Urocyon littoralis 8 | Flickr |
| Blandford's fox | Vulpes cana 1 | Arkive |
| Blandford's fox | Vulpes cana 2 | BioLib |
| Blandford's fox | Vulpes cana 3 | Encyclopedia of Life |
| Cape fox | Vulpes chama 1 | Nature Picture Library |
| Cape fox | Vulpes chama 2 | Arkive |
| Cape fox | Vulpes chama 3 | BioLib |
| Cape fox | Vulpes chama 4 | Getty Images |
| Corsac fox | Vulpes corsac 1 | Nature Picture Library |
| Corsac fox | Vulpes corsac 2 | Arkive |
| Corsac fox | Vulpes corsac 3 | Encyclopedia of Life |
| Corsac fox | Vulpes corsac 4 | Nature Photo CZ |
| Corsac fox | Vulpes corsac 5 | Zoochat |
| Corsac fox | Vulpes corsac 6 | Zoochat |
| Corsac fox | Vulpes corsac 7 | Flickr |
| Corsac fox | Vulpes corsac 8 | http://www.photographersonsafari.com/wp-content/gallery/hamerton_1/corsac-fox-2523-hamerton-copyright-photographers-on-safari-com.jpg, |
| Tibetan sand fox | Vulpes ferrilata 1 | Flickr |
| Tibetan sand fox | Vulpes ferrilata 2 | Arkive |
| Tibetan sand fox | Vulpes ferrilata 3 | Nature Picture Library |
| Tibetan sand fox | Vulpes ferrilata 4 | Nature Picture Library |
| Arctic fox | Vulpes lagopus 1 I | Nature Picture Library |
| Arctic fox | Vulpes lagopus 10 Summer | Nature Picture Library |
| Arctic fox | Vulpes lagopus 2 Intermediate | Nature Picture Library |
| Arctic fox | Vulpes lagopus 3 Intermediate | Nature Picture Library |
| Arctic fox | Vulpes lagopus 4 Intermediate | Nature Picture Library |
| Arctic fox | Vulpes lagopus 5 Winter | Nature Picture Library |
| Arctic fox | Vulpes lagopus 6 Summer | Nature Picture Library |
| Arctic fox | Vulpes lagopus 7 Summer | BioLib |
| Arctic fox | Vulpes lagopus 8 Intermediate | Flickr |
| Arctic fox | Vulpes lagopus 9 Winter | Flickr |
| Kit fox | Vulpes macrotis 1 | Nature Picture Library |
| Kit fox | Vulpes macrotis 2 | BioLib |
| Kit fox | Vulpes macrotis 3 | Flickr |
| Kit fox | Vulpes macrotis 4 | Flickr |
| Kit fox | Vulpes macrotis 5 | Flickr |
| Kit fox | Vulpes macrotis 6 | Flickr |
| Sand fox | Vulpes rueppellii 1 | Arkive |
| Sand fox | Vulpes rueppellii 2 | Encyclopedia of Life |
| Sand fox | Vulpes rueppellii 3 | Mammal Image Library |
| Sand fox | Vulpes rueppellii 4 | Carnivora Forum |
| Red fox | Vulpes vulpes 1 (RIGHT) | Nature Picture Library |
| Red fox | Vulpes vulpes 10 | Nature Picture Library |
| Red fox | Vulpes vulpes 2 (LEFT) | Nature Picture Library |
| Red fox | Vulpes vulpes 3 | Nature Picture Library |
| Red fox | Vulpes vulpes 4 | Nature Picture Library |
| Red fox | Vulpes vulpes 5 | Nature Picture Library |
| Red fox | Vulpes vulpes 6 | Nature Picture Library |
| Red fox | Vulpes vulpes 7 | Nature Picture Library |
| Red fox | Vulpes vulpes 8 | Nature Picture Library |
| Red fox | Vulpes vulpes 9 | Nature Picture Library |
| Fennec fox | Vulpes zerda 1 | Mammal Image Library |
| Fennec fox | Vulpes zerda 2 | Encyclopedia of Life |
| Fennec fox | Vulpes zerda 3 | Encyclopedia of Life |
| Fennec fox | Vulpes zerda 4 | Flickr |
| Fennec fox | Vulpes zerda 5 | Flickr |
| Fossa | Cryptoprocta ferox 1 | Flickr |
| Fossa | Cryptoprocta ferox 10 | Flickr |
| Fossa | Cryptoprocta ferox 2 | Nature Picture Library |
| Fossa | Cryptoprocta ferox 3 | Flickr |
| Fossa | Cryptoprocta ferox 4 | Flickr |
| Fossa | Cryptoprocta ferox 5 | Flickr |
| Fossa | Cryptoprocta ferox 6 | Flickr |
| Fossa | Cryptoprocta ferox 7 | Flickr |
| Fossa | Cryptoprocta ferox 8 | Flickr |
| Fossa | Cryptoprocta ferox 9 | Flickr |
| Malagasy civet | Fossa fossana 1 | Nature Picture Library |
| Malagasy civet | Fossa fossana 2 | Nature Picture Library |
| Malagasy civet | Fossa fossana 3 | Arkive |
| Malagasy civet | Fossa fossana 4 | Flickr |
| Malagasy civet | Fossa fossana 5 | Flickr |
| Ring-tailed mongoose | Galidia elegans 1 | Nature Picture Library |
| Ring-tailed mongoose | Galidia elegans 10 | Flickr |
| Ring-tailed mongoose | Galidia elegans 2 | Nature Picture Library |
| Ring-tailed mongoose | Galidia elegans 3 | Nature Picture Library |
| Ring-tailed mongoose | Galidia elegans 4 | Nature Picture Library |
| Ring-tailed mongoose | Galidia elegans 6 | Encyclopedia of Life |
| Ring-tailed mongoose | Galidia elegans 7 | Flickr |
| Ring-tailed mongoose | Galidia elegans 8 | Encyclopedia of Life |
| Ring-tailed mongoose | Galidia elegans 9 | Flickr |
| Malagasy narrow-striped mongoose | Mungotictis decemlineata 1 | Nature Picture Library |
| Malagasy narrow-striped mongoose | Mungotictis decemlineata 2 | BioLib |
| Malagasy narrow-striped mongoose | Mungotictis decemlineata 3 | BioLib |
| Malagasy narrow-striped mongoose | Mungotictis decemlineata 4 | Nature Picture Library |
| Malagasy narrow-striped mongoose | Mungotictis decemlineata 5 | Nature Picture Library |
| Malagasy narrow-striped mongoose | Mungotictis decemlineata 6 | BioLib |
| Malagasy narrow-striped mongoose | Mungotictis decemlineata 7 | BioLib |
| Malagasy brown-tailed mongoose | Salanoia concolor 1 | Arkive |
| Cheetah | Acinonyx jubatus 1 | National Geographic |
| Cheetah | Acinonyx jubatus 10 | National Geographic |
| Cheetah | Acinonyx jubatus 2 | Arkive |
| Cheetah | Acinonyx jubatus 3 | Arkive |
| Cheetah | Acinonyx jubatus 4 | Arkive |
| Cheetah | Acinonyx jubatus 5 | Arkive |
| Cheetah | Acinonyx jubatus 6 | Arkive |
| Cheetah | Acinonyx jubatus 7 FRONT | Arkive |
| Cheetah | Acinonyx jubatus 8 | Arkive |
| Cheetah | Acinonyx jubatus 9 | Arkive |
| Caracal | Caracal caracal 1 | Nature Picture Library |
| Caracal | Caracal caracal 10 | Flickr |
| Caracal | Caracal caracal 2 | Nature Picture Library |
| Caracal | Caracal caracal 3 | Nature Picture Library |
| Caracal | Caracal caracal 4 | Nature Picture Library |
| Caracal | Caracal caracal 5 | Arkive |
| Caracal | Caracal caracal 6 | Arkive |
| Caracal | Caracal caracal 7 | Arkive |
| Caracal | Caracal caracal 8 | BioLib |
| Caracal | Caracal caracal 9 | BioLib |
| Bay cat | Catopuma badia 1 | Encyclopedia of Life |
| Bay cat | Catopuma badia 2 | http://www.sciencedaily.com/releases/2011/06/110628095035.htm |
| Asian golden cat | Catopuma temminckii 1 | Arkive |
| Asian golden cat | Catopuma temminckii 2 | Arkive |
| Asian golden cat | Catopuma temminckii 3 | Arkive |
| Asian golden cat | Catopuma temminckii 4 | Flickr |
| Jungle cat | Felis chaus 1 | Nature Picture Library |
| Jungle cat | Felis chaus 2 | Arkive |
| Jungle cat | Felis chaus 3 | Arkive |
| Jungle cat | Felis chaus 4 | Arkive |
| Jungle cat | Felis chaus 5 | Flickr |
| Sand cat | Felis margarita 1 | Nature Picture Library |
| Sand cat | Felis margarita 2 | Nature Picture Library |
| Sand cat | Felis margarita 3 | Nature Picture Library |
| Sand cat | Felis margarita 4 | Flickr |
| Sand cat | Felis margarita 5 | Flickr |
| Sand cat | Felis margarita 6 | Arkive |
| Sand cat | Felis margarita 7 | Flickr |
| Black-footed cat | Felis nigripes 1 | Arkive |
| Wild cat | Felis silvestris 1 | Nature Picture Library |
| Wild cat | Felis silvestris 2 | Nature Picture Library |
| Wild cat | Felis silvestris 3 | Nature Picture Library |
| Wild cat | Felis silvestris 4 | Nature Picture Library |
| Wild cat | Felis silvestris 5 | Nature Picture Library |
| Wild cat | Felis silvestris 6 | Nature Picture Library |
| Wild cat | Felis silvestris 7 | Arkive |
| Wild cat | Felis silvestris 8 | Arkive |
| Jaguarundi | Puma yagouaroundi 1 | Nature Picture Library |
| Jaguarundi | Puma yagouaroundi 10 | Arkive |
| Jaguarundi | Puma yagouaroundi 2 | Nature Picture Library |
| Jaguarundi | Puma yagouaroundi 3 | Encyclopedia of Life |
| Jaguarundi | Puma yagouaroundi 4 | Encyclopedia of Life |
| Jaguarundi | Puma yagouaroundi 5 | BioLib |
| Jaguarundi | Puma yagouaroundi 6 | BioLib |
| Jaguarundi | Puma yagouaroundi 7 | BioLib |
| Jaguarundi | Puma yagouaroundi 8 | Arkive |
| Jaguarundi | Puma yagouaroundi 9 | Arkive |
| Pampas cat | Leopardus colocolo 1 | Mammal Image Library |
| Pampas cat | Leopardus colocolo 2 | http://www.planet-mammiferes.org/drupal/en/node/40?indice2=Photos%2FCarniv%2FFelides%2FFPampa4b.jpg |
| Pampas cat | Leopardus colocolo 3 | https://felids.files.wordpress.com/2012/08/img_7903-small.jpg, |
| Geoffroy's cat | Leopardus geoffroyi 1 | Wikipedia |
| Geoffroy's cat | Leopardus geoffroyi 10 | BioLib |
| Geoffroy's cat | Leopardus geoffroyi 2 | Wikimedia Commons |
| Geoffroy's cat | Leopardus geoffroyi 3 | BioLib |
| Geoffroy's cat | Leopardus geoffroyi 4 | http://www.wildcatconservation.org/wild-cats/south-america/geoffroys-cat/ |
| Geoffroy's cat | Leopardus geoffroyi 5 (MELANISTIC) | Nature Picture Library |
| Geoffroy's cat | Leopardus geoffroyi 6 | Flickr |
| Geoffroy's cat | Leopardus geoffroyi 7 | Flickr |
| Geoffroy's cat | Leopardus geoffroyi 8 | Flickr |
| Geoffroy's cat | Leopardus geoffroyi 9 | Flickr |
| Kodkod | Leopardus guigna 1 | Flickr |
| Andean mountain cat | Leopardus jacobitus 1 | Arkive |
| Ocelot | Leopardus pardalis 1 | Nature Picture Library |
| Ocelot | Leopardus pardalis 2 | Nature Picture Library |
| Ocelot | Leopardus pardalis 3 | Nature Picture Library |
| Ocelot | Leopardus pardalis 4 | Nature Picture Library |
| Ocelot | Leopardus pardalis 5 | Nature Picture Library |
| Little spotted cat (Oncilla) | Leopardus tigrinus 1 | Nature Picture Library |
| Little spotted cat (Oncilla) | Leopardus tigrinus 2 | Nature Picture Library |
| Little spotted cat (Oncilla) | Leopardus tigrinus 3 | Nature Picture Library |
| Little spotted cat (Oncilla) | Leopardus tigrinus 4 | Flickr |
| Little spotted cat (Oncilla) | Leopardus tigrinus 5 | Flickr |
| Little spotted cat (Oncilla) | Leopardus tigrinus 6 | Flickr |
| Margay | Leopardus wiedii 1 | Arkive |
| Margay | Leopardus wiedii 10 | Biolib |
| Margay | Leopardus wiedii 2 | Nature Picture Library |
| Margay | Leopardus wiedii 3 | Nature Picture Library |
| Margay | Leopardus wiedii 4 | Wikimedia Commons |
| Margay | Leopardus wiedii 5 | Wikimedia Commons |
| Margay | Leopardus wiedii 6 | Flickr |
| Margay | Leopardus wiedii 7 | Flickr |
| Margay | Leopardus wiedii 8 | Flickr |
| Margay | Leopardus wiedii 9 | Flickr |
| Serval | Leptailurus serval 1 | Nature Picture Library |
| Serval | Leptailurus serval 14 | Flickr |
| Serval | Leptailurus serval 15 | Flickr |
| Serval | Leptailurus serval 16 | Flickr |
| Serval | Leptailurus serval 2 | Nature Picture Library |
| Serval | Leptailurus serval 3 | Nature Picture Library |
| Serval | Leptailurus serval 4 | Nature Picture Library |
| Serval | Leptailurus serval 5 | Nature Picture Library |
| Serval | Leptailurus serval 6 | Nature Picture Library |
| Serval | Leptailurus serval 7 | Nature Picture Library |
| Serval | Leptailurus serval 8 | Nature Picture Library |
| Canadian lynx | Lynx canadensis 1 | Nature Picture Library |
| Canadian lynx | Lynx canadensis 2 | Arkive |
| Canadian lynx | Lynx canadensis 3 | BioLib |
| Canadian lynx | Lynx canadensis 4 | Encyclopedia of Life |
| Canadian lynx | Lynx canadensis 5 | Flickr |
| Canadian lynx | Lynx canadensis 6 | Flickr |
| Canadian lynx | Lynx canadensis 7 | Flickr |
| Eurasian lynx | Lynx lynx 1 | BioLib |
| Eurasian lynx | Lynx lynx 2 | Biolib |
| Eurasian lynx | Lynx lynx 3 | Nature Picture Library |
| Eurasian lynx | Lynx lynx 4 | Nature Picture Library |
| Eurasian lynx | Lynx lynx 5 | http://www.wildlifearticles.co.uk/wp-content/uploads/2014/10/lynx.jpg, |
| Eurasian lynx | Lynx lynx 6 | http://www.bioregio-carpathians.eu/tl_files/bioregio/donwnloads_resources/gallery/red_lists/eurasian_lynx.jpg |
| Eurasian lynx | Lynx lynx 7 | Zoochat |
| Iberian (Spanish) lynx | Lynx pardinus 1 | Nature Picture Library |
| Iberian (Spanish) lynx | Lynx pardinus 10 | Zoochat |
| Iberian (Spanish) lynx | Lynx pardinus 11 | http://www.pbase.com/cplummer/image/146107631 |
| Iberian (Spanish) lynx | Lynx pardinus 2 | Nature Picture Library |
| Iberian (Spanish) lynx | Lynx pardinus 3 | Nature Picture Library |
| Iberian (Spanish) lynx | Lynx pardinus 4 | Nature Picture Library |
| Iberian (Spanish) lynx | Lynx pardinus 5 | Nature Picture Library |
| Iberian (Spanish) lynx | Lynx pardinus 6 | Nature Picture Library |
| Iberian (Spanish) lynx | Lynx pardinus 7 | Nature Picture Library |
| Iberian (Spanish) lynx | Lynx pardinus 8 | Flickr |
| Iberian (Spanish) lynx | Lynx pardinus 9 | http://imgkid.com/lynx-pardinus.shtml |
| Bobcat | Lynx rufus 1 | Biolib |
| Bobcat | Lynx rufus 10 | Flickr |
| Bobcat | Lynx rufus 11 | Flickr |
| Bobcat | Lynx rufus 2 | Encyclopedia of Life |
| Bobcat | Lynx rufus 3 | Encyclopedia of Life |
| Bobcat | Lynx rufus 4 | Encyclopedia of Life |
| Bobcat | Lynx rufus 5 | Encyclopedia of Life |
| Bobcat | Lynx rufus 6 | Flickr |
| Bobcat | Lynx rufus 7 | Flickr |
| Bobcat | Lynx rufus 8 | Flickr |
| Bobcat | Lynx rufus 9 | Flickr |
| Diard's clouded leopard | Neofelis diardi 1 | Carnivora Forum |
| Diard's clouded leopard | Neofelis diardi 2 | Biolib |
| Diard's clouded leopard | Neofelis diardi 3 | Arkive |
| Clouded leopard | Neofelis nebulosa 1 | Nature Picture Library |
| Clouded leopard | Neofelis nebulosa 2 | Nature Picture Library |
| Clouded leopard | Neofelis nebulosa 3 | Mammal Image Library |
| Clouded leopard | Neofelis nebulosa 4 | Encyclopedia of Life |
| Pallas's cat | Felis manul 1 | Nature Picture Library |
| Pallas's cat | Felis manul 2 | Arkive |
| Pallas's cat | Felis manul 3 | Encyclopedia of Life |
| Pallas's cat | Felis manul 4 | Encyclopedia of Life |
| Pallas's cat | Felis manul 5 | Flickr |
| Pallas's cat | Felis manul 6 | Flickr |
| Pallas's cat | Felis manul 7 | Flickr |
| Pallas's cat | Felis manul 8 | Flickr |
| Lion | Panthera leo 1 M | Nature Picture Library |
| Lion | Panthera leo 10 M | Nature Picture Library |
| Lion | Panthera leo 2 M | Nature Picture Library |
| Lion | Panthera leo 3 (LEFT) F | Nature Picture Library |
| Lion | Panthera leo 4 F | Nature Picture Library |
| Lion | Panthera leo 5 M | Nature Picture Library |
| Lion | Panthera leo 6 M | Nature Picture Library |
| Lion | Panthera leo 7 M | Nature Picture Library |
| Lion | Panthera leo 8 F | Nature Picture Library |
| Lion | Panthera leo 9 F | Nature Picture Library |
| Jaguar | Panthera onca 1 (MELANISTIC) | Nature Picture Library |
| Jaguar | Panthera onca 10 (MELANISTIC) | Biolib |
| Jaguar | Panthera onca 2 | Nature Picture Library |
| Jaguar | Panthera onca 3 | Nature Picture Library |
| Jaguar | Panthera onca 4 | Nature Picture Library |
| Jaguar | Panthera onca 5 | Mammal Image Library |
| Jaguar | Panthera onca 6 (LEFT) | Nature Picture Library |
| Jaguar | Panthera onca 7 | Nature Picture Library |
| Jaguar | Panthera onca 8 | Biolib |
| Jaguar | Panthera onca 9 (MELANISTIC) | Biolib |
| Leopard | Panthera pardus 1 | Nature Picture Library |
| Leopard | Panthera pardus 10 | Nature Picture Library |
| Leopard | Panthera pardus 2 (MELANISTIC) | Nature Picture Library |
| Leopard | Panthera pardus 3 | Nature Picture Library |
| Leopard | Panthera pardus 5 | Nature Picture Library |
| Leopard | Panthera pardus 6 | Nature Picture Library |
| Leopard | Panthera pardus 7 | Nature Picture Library |
| Leopard | Panthera pardus 8 | Nature Picture Library |
| Leopard | Panthera pardus 9 | Nature Picture Library |
| Tiger | Panthera tigris 1 | Nature Picture Library |
| Tiger | Panthera tigris 10 | http://a-z-animals.com/media/animals/images/original/indochinese_tiger4.jpg, |
| Tiger | Panthera tigris 2 | Nature Picture Library |
| Tiger | Panthera tigris 3 | Nature Picture Library |
| Tiger | Panthera tigris 4 | Nature Picture Library |
| Tiger | Panthera tigris 5 | Nature Picture Library |
| Tiger | Panthera tigris 6 | Nature Picture Library |
| Tiger | Panthera tigris 7 | Nature Picture Library |
| Tiger | Panthera tigris 8 | http://www.e-torch.org/wp-content/uploads/2013/08/Fullsize-Damai-700x503.jpg, |
| Tiger | Panthera tigris 9 | content/uploads/2014/01/indochinese_tiger_1.jpg, |
| Marbled cat | Pardofelis marmorata 1 | Nature Picture Library |
| Marbled cat | Pardofelis marmorata 2 (PRESERVED) | Mammal Image Library |
| Marbled cat | Pardofelis marmorata 3 | Arkive |
| Leopard cat | Prionailurus bengalensis 1 | Arkive |
| Leopard cat | Prionailurus bengalensis 2 | Biolib |
| Leopard cat | Prionailurus bengalensis 3 | Biolib |
| Irimote cat | Prionailurus iriomotensis 1 | Animals and Earth |
| Irimote cat | Prionailurus iriomotensis 2 | Animals and Earth |
| Irimote cat | Prionailurus iriomotensis 3 | Nature Picture Library |
| Flat-headed cat | Prionailurus planiceps 1 | Arkive |
| Flat-headed cat | Prionailurus planiceps 2 | http://news.mongabay.com/2014/1021-hance-seasia-cats.html  tp://s3.amazonaws.com/mongabay-images/14/1020flatheadedcat.IMG_0798.600.jpg, |
| Rusty-spotted cat | Prionailurus rubiginosa 1 | Arkive |
| Rusty-spotted cat | Prionailurus rubiginosa 2 | Flickr |
| Rusty-spotted cat | Prionailurus rubiginosa 3 | Flickr |
| Rusty-spotted cat | Prionailurus rubiginosa 4 | Flickr |
| Rusty-spotted cat | Prionailurus rubiginosa 5 | Flickr |
| Rusty-spotted cat | Prionailurus rubiginosa 6 | Nature Picture Library |
| Rusty-spotted cat | Prionailurus rubiginosa 7 | Nature Picture Library |
| Rusty-spotted cat | Prionailurus rubiginosa 8 | Flickr |
| Rusty-spotted cat | Prionailurus rubiginosa 9 | Flickr |
| Fishing cat | Prionailurus viverrinus 1 | Nature Picture Library |
| Fishing cat | Prionailurus viverrinus 2 | Nature Picture Library |
| Fishing cat | Prionailurus viverrinus 3 | Arkive |
| Fishing cat | Prionailurus viverrinus 4 | Biolib |
| Fishing cat | Prionailurus viverrinus 6 | Nature Picture Library |
| African golden cat | Profelis aurata 1 | Arkive |
| African golden cat | Profelis aurata 2 | Arkive |
| Mountain lion | Puma concolor 1 | Nature Picture Library |
| Mountain lion | Puma concolor 11 | Flickr |
| Mountain lion | Puma concolor 2 | Nature Picture Library |
| Mountain lion | Puma concolor 3 | Biolib |
| Mountain lion | Puma concolor 4 | Flickr |
| Mountain lion | Puma concolor 5 | Nature Picture Library |
| Mountain lion | Puma concolor 6 | Nature Picture Library |
| Mountain lion | Puma concolor 7 | Encyclopedia of Life |
| Mountain lion | Puma concolor 8 | Flickr |
| Mountain lion | Puma concolor 9 | Flickr |
| Snow leopard | Panthera uncia 1 | Nature Picture Library |
| Snow leopard | Panthera uncia 10 | Nature Picture Library |
| Snow leopard | Panthera uncia 2 | Arkive |
| Snow leopard | Panthera uncia 3 | Arkive |
| Snow leopard | Panthera uncia 4 | Arkive |
| Snow leopard | Panthera uncia 5 | Nature Picture Library |
| Snow leopard | Panthera uncia 6 | Nature Picture Library |
| Snow leopard | Panthera uncia 7 | Nature Picture Library |
| Snow leopard | Panthera uncia 8 | Nature Picture Library |
| Snow leopard | Panthera uncia 9 | Nature Picture Library |
| Marsh mongoose | Atilax paludinosus 1 | Nature Picture Library |
| Marsh mongoose | Atilax paludinosus 2 | Arkive |
| Bushy-tailed mongoose | Bdeogale crassicauda 1 | Wikipedia |
| Black-footed mongoose | Bdeogale nigripes 1 | http://s3.amazonaws.com/mongabay-images/13/1017.2.-B.-nigripes-_LB-Panthera-(small). |
| Alexander's kusimanse | Crossarchus alexandri 1 | http://www.zooclub.ru/attach/wild/723.jpg, |
| Long-nosed cusimanse | Crossarchus obscurus 1 | Encyclopedia of Life |
| Long-nosed cusimanse | Crossarchus obscurus 2 | Biolib |
| Long-nosed cusimanse | Crossarchus obscurus 3 | Encyclopedia of Life |
| Long-nosed cusimanse | Crossarchus obscurus 4 | Biolib |
| Yellow mongoose | Cynictis penicillata 1 | Nature Picture Library |
| Yellow mongoose | Cynictis penicillata 10 | Biolib |
| Yellow mongoose | Cynictis penicillata 2 | Nature Picture Library |
| Yellow mongoose | Cynictis penicillata 3 | Nature Picture Library |
| Yellow mongoose | Cynictis penicillata 4 | Nature Picture Library |
| Yellow mongoose | Cynictis penicillata 5 | Nature Picture Library |
| Yellow mongoose | Cynictis penicillata 6 | Nature Picture Library |
| Yellow mongoose | Cynictis penicillata 7 | Biolib |
| Yellow mongoose | Cynictis penicillata 8 | Biolib |
| Yellow mongoose | Cynictis penicillata 9 | Biolib |
| Cape grey mongoose | Galerella pulverulenta 1 | Nature Picture Library |
| Cape grey mongoose | Galerella pulverulenta 2 | Biolib |
| Cape grey mongoose | Galerella pulverulenta 3 | Encyclopedia of Life |
| Slender mongoose | Galerella sanguinea 1 | Arkive |
| Slender mongoose | Galerella sanguinea 2 | Arkive |
| Slender mongoose | Galerella sanguinea 3 | Arkive |
| Slender mongoose | Galerella sanguinea 4 | Nature Picture Library |
| Slender mongoose | Galerella sanguinea 5 | Nature Picture Library |
| Slender mongoose | Galerella sanguinea 6 | Nature Picture Library |
| Slender mongoose | Galerella sanguinea 7 | Biolib |
| Ethiopian dwarf mongoose | Helogale parvula 1 | Nature Picture Library |
| Ethiopian dwarf mongoose | Helogale parvula 2 | Nature Picture Library |
| Ethiopian dwarf mongoose | Helogale parvula 3 | Arkive |
| Ethiopian dwarf mongoose | Helogale parvula 4 | Biolib |
| Ethiopian dwarf mongoose | Helogale parvula 5 | Biolib |
| Ethiopian dwarf mongoose | Helogale parvula 6 | Biolib |
| (Common) dwarf mongoose | Hemigalus derbyanus 1 | Encyclopedia of Life |
| (Common) dwarf mongoose | Hemigalus derbyanus 2 | Encyclopedia of Life |
| (Common) dwarf mongoose | Hemigalus derbyanus 3 | Encyclopedia of Life |
| (Common) dwarf mongoose | Hemigalus derbyanus 4 | Nature Picture Library |
| Small asian mongoose | Herpestes auropunctatus 1 | Nature Picture Library |
| Short-tailed mongoose | Herpestes brachyurus 1 | http://www.leszoosdanslemonde.com/gal2data/albums/mammiferes/carnivora/herpestidae/herpestes_brachyurus/petaling_jaya_herpestes_brachyurus_2009_1.jpg, |
| Indian gray mongose | Herpestes edwardsi 1 | Arkive |
| Indian gray mongose | Herpestes edwardsi 10 | Encyclopedia of Life |
| Indian gray mongose | Herpestes edwardsi 2 | Biolib |
| Indian gray mongose | Herpestes edwardsi 3 | Encyclopedia of Life |
| Indian gray mongose | Herpestes edwardsi 4 | Encyclopedia of Life |
| Indian gray mongose | Herpestes edwardsi 5 | Flickr |
| Indian gray mongose | Herpestes edwardsi 6 | Flickr |
| Indian gray mongose | Herpestes edwardsi 7 | Nature Picture Library |
| Indian gray mongose | Herpestes edwardsi 8 | Nature Picture Library |
| Indian gray mongose | Herpestes edwardsi 9 | Encyclopedia of Life |
| Indian brown mongoose | Herpestes fuscus 1 | Encyclopedia of Life |
| Indian brown mongoose | Herpestes fuscus 2 | Encyclopedia of Life |
| Egyptian mongoose | Herpestes ichneumon 1 | Animals and Earth |
| Egyptian mongoose | Herpestes ichneumon 10 | Flickr |
| Egyptian mongoose | Herpestes ichneumon 2 | Nature Picture Library |
| Egyptian mongoose | Herpestes ichneumon 3 | Flickr |
| Egyptian mongoose | Herpestes ichneumon 4 | Flickr |
| Egyptian mongoose | Herpestes ichneumon 5 | Flickr |
| Egyptian mongoose | Herpestes ichneumon 6 | Flickr |
| Egyptian mongoose | Herpestes ichneumon 7 | Flickr |
| Egyptian mongoose | Herpestes ichneumon 8 | Flickr |
| Egyptian mongoose | Herpestes ichneumon 9 | Encyclopedia of Life |
| Long-nosed mongoose | Herpestes naso 1 | http://img2.wikia.nocookie.net/__cb20130727084754/animalofthewould/images/b/bf/Long-Nosed_Mongoose.jpg, |
| Ruddy mongoose | Herpestes smithii 1 | Nature Picture Library |
| Ruddy mongoose | Herpestes smithii 2 | Nature Picture Library |
| Ruddy mongoose | Herpestes smithii 3 | Nature Picture Library |
| Crab-eating mongoose | Herpestes urva 1 | Flickr |
| Crab-eating mongoose | Herpestes urva 2 | Flickr |
| Crab-eating mongoose | Herpestes urva 3 | Flickr |
| Crab-eating mongoose | Herpestes urva 4 | http://amuseum.cdstm.cn/AMuseum/dongwu/images/01/010510005-1.jpg, |
| Stripe-necked mongoose | Herpestes vitticollis 1 | Flickr |
| Stripe-necked mongoose | Herpestes vitticollis 2 | Flickr |
| Stripe-necked mongoose | Herpestes vitticollis 3 | Flickr |
| Stripe-necked mongoose | Herpestes vitticollis 4 | Flickr |
| Stripe-necked mongoose | Herpestes vitticollis 5 | Flickr |
| Stripe-necked mongoose | Herpestes vitticollis 6 | Arkive |
| White-tailed mongoose | Ichneumia albicauda 1 | Arkive |
| White-tailed mongoose | Ichneumia albicauda 2 | Arkive |
| White-tailed mongoose | Ichneumia albicauda 3 | Biolib |
| White-tailed mongoose | Ichneumia albicauda 4 | Flickr |
| White-tailed mongoose | Ichneumia albicauda 5 | Flickr |
| White-tailed mongoose | Ichneumia albicauda 6 | Nature Picture Library |
| Liberian mongoose | Liberiictis kuhni 1 | Arkive |
| Banded mongoose | Mungos mungo 1 | Arkive |
| Banded mongoose | Mungos mungo 2 | Biolib |
| Banded mongoose | Mungos mungo 3 | Encyclopedia of Life |
| Banded mongoose | Mungos mungo 4 | Encyclopedia of Life |
| Banded mongoose | Mungos mungo 5 | Flickr |
| Banded mongoose | Mungos mungo 6 | Nature Picture Library |
| Banded mongoose | Mungos mungo 7 | Nature Picture Library |
| Banded mongoose | Mungos mungo 8 | Nature Picture Library |
| Gray meerkat (Selous's mongoose) | Paracynictis selousi 1 | http://www.planet-mammiferes.org/drupal/en/node/40?indice2=Photos%2FCarniv%2FViverrid%2FParaSel4.jpg |
| Meller's mongoose | Rhynchogale melleri 1 | Encyclopedia of Life |
| Suricate (Slender-tailed meerkat) | Suricata suricatta 1 | Nature Picture Library |
| Suricate (Slender-tailed meerkat) | Suricata suricatta 2 | Nature Picture Library |
| Suricate (Slender-tailed meerkat) | Suricata suricatta 3 | Nature Picture Library |
| Suricate (Slender-tailed meerkat) | Suricata suricatta 4 | Nature Picture Library |
| Suricate (Slender-tailed meerkat) | Suricata suricatta 5 | Nature Picture Library |
| Suricate (Slender-tailed meerkat) | Suricata suricatta 6 | Nature Picture Library |
| Suricate (Slender-tailed meerkat) | Suricata suricatta 7 | Nature Picture Library |
| Suricate (Slender-tailed meerkat) | Suricata suricatta 8 | Biolib |
| Spotted hyaena | Crocuta crocuta 1 | Nature Picture Library |
| Spotted hyaena | Crocuta crocuta 10 | Flickr |
| Spotted hyaena | Crocuta crocuta 2 | Nature Picture Library |
| Spotted hyaena | Crocuta crocuta 3 | Nature Picture Library |
| Spotted hyaena | Crocuta crocuta 4 | Arkive |
| Spotted hyaena | Crocuta crocuta 5 | Encyclopedia of Life |
| Spotted hyaena | Crocuta crocuta 6 | Flickr |
| Spotted hyaena | Crocuta crocuta 7 | Flickr |
| Spotted hyaena | Crocuta crocuta 8 | Flickr |
| Spotted hyaena | Crocuta crocuta 9 | Animals and Earth |
| Spotted hyaena | Crocuta crocuta 9.jpg | Wikimedia Commons |
| Striped hyaena | Hyaena hyaena 1 | Arkive |
| Striped hyaena | Hyaena hyaena 10 | Flickr |
| Striped hyaena | Hyaena hyaena 11 | Nature Picture Library |
| Striped hyaena | Hyaena hyaena 2 | Arkive |
| Striped hyaena | Hyaena hyaena 3 | Arkive |
| Striped hyaena | Hyaena hyaena 4 | Mammal Image Library |
| Striped hyaena | Hyaena hyaena 5 | Biolib |
| Striped hyaena | Hyaena hyaena 6 | Encyclopedia of Life |
| Striped hyaena | Hyaena hyaena 7 | Encyclopedia of Life |
| Striped hyaena | Hyaena hyaena 8 | Flickr |
| Striped hyaena | Hyaena hyaena 9 | Flickr |
| Brown hyaena | Hyaena brunnea 1 | Nature Picture Library |
| Brown hyaena | Hyaena brunnea 10 | Flickr |
| Brown hyaena | Hyaena brunnea 2 | Nature Picture Library |
| Brown hyaena | Hyaena brunnea 3 | Animals and Earth |
| Brown hyaena | Hyaena brunnea 3.jpg | Nature Picture Library |
| Brown hyaena | Hyaena brunnea 5 | Flickr |
| Brown hyaena | Hyaena brunnea 5.jpg | Encyclopedia of Life |
| Brown hyaena | Hyaena brunnea 6 | Flickr |
| Brown hyaena | Hyaena brunnea 7 | Nature Picture Library |
| Brown hyaena | Hyaena brunnea 8 | Flickr |
| Brown hyaena | Hyaena brunnea 9 | Flickr |
| Aardwolf | Proteles cristata 1 | Nature Picture Library |
| Aardwolf | Proteles cristata 2 | Nature Picture Library |
| Aardwolf | Proteles cristata 3 | Nature Picture Library |
| Aardwolf | Proteles cristata 4 | Wikimedia Commons |
| Aardwolf | Proteles cristata 5 | Flickr |
| Aardwolf | Proteles cristata 6 | Flickr |
| Aardwolf | Proteles cristata 7 | Nature Picture Library |
| Aardwolf | Proteles cristata 8 | Biolib |
| Aardwolf | Proteles cristata 9 | Biolib |
| Molina's hog nosed skunk | Conepatus chinga 1 | Encyclopedia of Life |
| Molina's hog nosed skunk | Conepatus chinga 2 | Encyclopedia of Life |
| Western hog nosed skunk | Conepatus mesoleucus 1 | Encyclopedia of Life |
| Hooded skunk | Mephitis macroura 1 | Arkive |
| Hooded skunk | Mephitis macroura 2 | Encyclopedia of Life |
| Striped skunk | Mephitis mephitis 1 | Nature Picture Library |
| Striped skunk | Mephitis mephitis 10 | Animals and Earth |
| Striped skunk | Mephitis mephitis 2 | Nature Picture Library |
| Striped skunk | Mephitis mephitis 3 | Nature Picture Library |
| Striped skunk | Mephitis mephitis 4 | Mammal Image Library |
| Striped skunk | Mephitis mephitis 5 | Arkive |
| Striped skunk | Mephitis mephitis 6 | Animal Diversity Web |
| Striped skunk | Mephitis mephitis 7 | Biolib |
| Striped skunk | Mephitis mephitis 8 | Biolib |
| Striped skunk | Mephitis mephitis 9 (LEFT) | Biolib |
| Western spotted skunk | Spilogale gracilis 1 | Encyclopedia of Life |
| Western spotted skunk | Spilogale gracilis 2 | Encyclopedia of Life |
| Eastern spotted skunk | Spilogale putorius 1 | Nature Picture Library |
| Eastern spotted skunk | Spilogale putorius 2 | Nature Picture Library |
| Eastern spotted skunk | Spilogale putorius 3 | Encyclopedia of Life |
| Eastern spotted skunk | Spilogale putorius 4 | Encyclopedia of Life |
| African clawless otter | Aonyx capensis 1 | Flickr |
| African clawless otter | Aonyx capensis 2 | Flickr |
| African clawless otter | Aonyx capensis 3 | Encyclopedia of Life |
| African clawless otter | Aonyx capensis 4 | http://www.capepointroute.co.za/blog/wp-content/uploads/2013/07/14-otter.jpg, |
| African clawless otter | Aonyx capensis 5 | http://natureontheedge.files.wordpress.com/2012/12/march_-cape-clawless-otters-come-visiting.jpg?w=700&h=&crop=1, |
| Oriental/Asian/Indian small-clawed otter | Aonyx cinereus 1 | Nature Picture Library |
| Oriental/Asian/Indian small-clawed otter | Aonyx cinereus 2 | Biolib |
| Oriental/Asian/Indian small-clawed otter | Aonyx cinereus 3 | Biolib |
| Oriental/Asian/Indian small-clawed otter | Aonyx cinereus 4 | Arkive |
| Hog badger | Arctonyx collaris 1 | Nature Picture Library |
| Hog badger | Arctonyx collaris 2 | witi.org http://www.wti.org.in/oldsite/pictures/hog-badger-released-cwrc.jpg, |
| Hog badger | Arctonyx collaris 3 (FUR STANDING UP) | Flickr |
| Hog badger | Arctonyx collaris 4 | http://www.indianaturewatch.net/images/album/photo/900586906515d2ff21efc2.jpg, |
| Hog badger | Arctonyx collaris 5 | Flickr |
| Hog badger | Arctonyx collaris 6 | Flickr |
| Hog badger | Arctonyx collaris 7 | Arkive |
| Hog badger | Arctonyx collaris 8 | http://www.ecologyasia.com/images-ghi/hog-badger_1920.jpg, |
| Tayra | Eira barbara 1 | Biolib |
| Tayra | Eira barbara 2 | Biolib |
| Tayra | Eira barbara 3 | Flickr |
| Tayra | Eira barbara 4 | Flickr |
| Tayra | Eira barbara 5 | Flickr |
| Tayra | Eira barbara 6 | Flickr |
| Tayra | Eira barbara 7 | Flickr |
| Sea otter | Enhydra lutris 1 | Arkive |
| Sea otter | Enhydra lutris 2 | Arkive |
| Sea otter | Enhydra lutris 3 | Nature Picture Library |
| Lesser grison | Galictis cuja 1 | Arkive |
| Lesser grison | Galictis cuja 2 | Arkive |
| Greater grison | Galictis vittata 1 | Encyclopedia of Life |
| Greater grison | Galictis vittata 2 | Arkive |
| Greater grison | Galictis vittata 3 | Arkive |
| Wolverine | Gulo gulo 1 | Arkive |
| Wolverine | Gulo gulo 2 | Nature Picture Library |
| Wolverine | Gulo gulo 3 | Nature Picture Library |
| Wolverine | Gulo gulo 4 | Nature Picture Library |
| Wolverine | Gulo gulo 5 | Nature Picture Library |
| Wolverine | Gulo gulo 6 | Nature Picture Library |
| Wolverine | Gulo gulo 7 | Nature Picture Library |
| Spotted-necked otter | Hydrictis maculicollis 1 | Encyclopedia of Life |
| Spotted-necked otter | Hydrictis maculicollis 2 | Arkive |
| North African striped weasel | Ictonyx libycus 1 | Encyclopedia of Life |
| North African striped weasel | Ictonyx libycus 2 | Biolib |
| North African striped weasel | Ictonyx libycus 3 | Biolib |
| North African striped weasel | Ictonyx libycus 4 | Biolib |
| Zorilla | Ictonyx striatus 1 | Arkive |
| Zorilla | Ictonyx striatus 2 | Biolib |
| Zorilla | Ictonyx striatus 3 | Flickr |
| Zorilla | Ictonyx striatus 4 | Animals and Earth |
| (North American) river otter | Lontra canadensis 1 | Arkive |
| (North American) river otter | Lontra canadensis 2 | Nature Picture Library |
| (North American) river otter | Lontra canadensis 3 | Nature Picture Library |
| (North American) river otter | Lontra canadensis 4 | Nature Picture Library |
| (North American) river otter | Lontra canadensis 5 | Nature Picture Library |
| (North American) river otter | Lontra canadensis 6 | Nature Picture Library |
| Marine otter | Lutra felina 1 COVEREND IN SAND | Arkive |
| Marine otter | Lutra felina 2 (LEFT) | Arkive |
| Neotropical otter | Lontra longicaudis 1 | Nature Picture Library |
| Neotropical otter | Lontra longicaudis 2 (SHINY WET) | Biolib |
| Southern river otter | Lontra provocax 1 | Arkive |
| Eurasian otter | Lutra lutra 1 | Arkive |
| Eurasian otter | Lutra lutra 2 | Nature Picture Library |
| Eurasian otter | Lutra lutra 3 | Nature Picture Library |
| Eurasian otter | Lutra lutra 4 | Nature Picture Library |
| Hairy-nosed otter | Lutra sumatrana 1 | Arkive |
| Smooth-coated otter | Lutrogale perspicillata 1 | Bio |
| Smooth-coated otter | Lutrogale perspicillata 2 | Encyclopedia of Life |
| Smooth-coated otter | Lutrogale perspicillata 3 | Encyclopedia of Life |
| Smooth-coated otter | Lutrogale perspicillata 4 | Encyclopedia of Life |
| American marten | Martes americana 1 | Arkive |
| American marten | Martes americana 2 | Nature Picture Library |
| American marten | Martes americana 3 | Encyclopedia of Life |
| American marten | Martes americana 4 | Flickr |
| American marten | Martes americana 5 | Flickr |
| American marten | Martes americana 6 | Flickr |
| Yellow-throated marten | Martes flavigula 1 | Biolib |
| Yellow-throated marten | Martes flavigula 10 | Flickr |
| Yellow-throated marten | Martes flavigula 11 | Flickr |
| Yellow-throated marten | Martes flavigula 2 | Biolib |
| Yellow-throated marten | Martes flavigula 3 | Biolib |
| Yellow-throated marten | Martes flavigula 4 | Biolib |
| Yellow-throated marten | Martes flavigula 5 | Encyclopedia of Life |
| Yellow-throated marten | Martes flavigula 6 | Flickr |
| Yellow-throated marten | Martes flavigula 7 | Flickr |
| Yellow-throated marten | Martes flavigula 8 | Flickr |
| Yellow-throated marten | Martes flavigula 9 | Flickr |
| Beech marten | Martes foina 1 | Encyclopedia of Life |
| Beech marten | Martes foina 2 | Encyclopedia of Life |
| Beech marten | Martes foina 3 | Flickr |
| Beech marten | Martes foina 4 | Flickr |
| Beech marten | Martes foina 5 | Flickr |
| Beech marten | Martes foina 6 | Nature Picture Library |
| Beech marten | Martes foina 7 | Nature Picture Library |
| Pine marten | Martes martes 1 | Nature Picture Library |
| Pine marten | Martes martes 2 | Nature Picture Library |
| Pine marten | Martes martes 3 | Nature Picture Library |
| Pine marten | Martes martes 4 | Flickr |
| Pine marten | Martes martes 5 | Encyclopedia of Life |
| Pine marten | Martes martes 6 | Flickr |
| Japanese marten | Martes melampus 1 | Nature Picture Library |
| Japanese marten | Martes melampus 2 | Flickr |
| Fisher | Martes pennanti 1 | Arkive |
| Fisher | Martes pennanti 2 | Encyclopedia of Life |
| Fisher | Martes pennanti 3 | Flickr |
| Sable | Martes zibellina 1 | Nature Picture Library |
| Sable | Martes zibellina 2 | Nature Picture Library |
| Sable | Martes zibellina 3 | Encyclopedia of Life |
| Sable | Martes zibellina 4 | Animals and Earth |
| Japanese badger | Meles anakuma 1 | Encyclopedia of Life |
| Japanese badger | Meles anakuma 2 | Flickr |
| Japanese badger | Meles anakuma 3 | Flickr |
| European badger | Meles meles 1 | Animals and Earth |
| European badger | Meles meles 2 | Getty Images |
| European badger | Meles meles 3 | Nature Picture Library |
| European badger | Meles meles 4 | Nature Picture Library |
| European badger | Meles meles 5 | Biolib |
| Honey badger | Mellivora capensis 1 | Nature Picture Library |
| Honey badger | Mellivora capensis 10 | Flickr |
| Honey badger | Mellivora capensis 2 | Nature Picture Library |
| Honey badger | Mellivora capensis 3 | Nature Picture Library |
| Honey badger | Mellivora capensis 4 | Biolib |
| Honey badger | Mellivora capensis 5 | Encyclopedia of Life |
| Honey badger | Mellivora capensis 6 | Flickr |
| Honey badger | Mellivora capensis 7 | Flickr |
| Honey badger | Mellivora capensis 8 | Flickr |
| Honey badger | Mellivora capensis 9 | Flickr |
| Chinese ferret badger | Melogale moschata 1 | Arkive |
| Chinese ferret badger | Melogale moschata 2 | Biolib |
| Chinese ferret badger | Melogale moschata 3 | Encyclopedia of Life |
| Chinese ferret badger | Melogale moschata 4 | Flickr |
| Burmese ferret-badger | Melogale personata 1 | http://image.wangchao.net.cn/baike/1284389045693.jpg, |
| Tropical weasel | Mustela africana 1 | http://www.eluniversoanimal.com/otros%20animales/mustelidos/mustelaafricana.jpg, |
| Mountain weasel | Mustela altaica 1 | Encyclopedia of Life |
| Mountain weasel | Mustela altaica 2 | Encyclopedia of Life |
| Mountain weasel | Mustela altaica 3 | Animals and Earth |
| Ermine, stoat | Mustela erminea 1 WINTER | Nature Picture Library |
| Ermine, stoat | Mustela erminea 10 SUMMER | Nature Picture Library |
| Ermine, stoat | Mustela erminea 11 SUMMER TAKE OUT | Nature Picture Library |
| Ermine, stoat | Mustela erminea 12 WINTER | Nature Picture Library |
| Ermine, stoat | Mustela erminea 2 WINTER | Nature Picture Library |
| Ermine, stoat | Mustela erminea 3 SUMMER | Nature Picture Library |
| Ermine, stoat | Mustela erminea 4 SUMMER | Nature Picture Library |
| Ermine, stoat | Mustela erminea 5 SUMMER | Nature Picture Library |
| Ermine, stoat | Mustela erminea 6 WINTER | Nature Picture Library |
| Ermine, stoat | Mustela erminea 7 INTERMED | Nature Picture Library |
| Ermine, stoat | Mustela erminea 8 INTERMED | Nature Picture Library |
| Ermine, stoat | Mustela erminea 9 SUMMER | Nature Picture Library |
| Steppe polecat | Mustela eversmanii 1 | Nature Picture Library |
| Long-tailed weasel | Mustela frenata 1 S | Encyclopedia of Life |
| Long-tailed weasel | Mustela frenata 2 S | Nature Picture Library |
| Long-tailed weasel | Mustela frenata 3 W | Arkive |
| Long-tailed weasel | Mustela frenata 4 S | Animal Diversity Web |
| Long-tailed weasel | Mustela frenata TRANSITION 1 | Flickr |
| Japanese weasel | 12 Mustela itatsi | https://www.pinterest.com/pin/123919427219325336/ |
| Japanese weasel | Mustela itatsi 1 | Wikipedia |
| Japanese weasel | Mustela itatsi 3 | Wikipedia |
| European mink | Mustela lutreola 1 | Encyclopedia of Life |
| European mink | Mustela lutreola 2 | Arkive |
| European mink | Mustela lutreola 3 | Arkive |
| European mink | Mustela lutreola 4 | Nature Picture Library |
| Black-footed ferret | Mustela nigripes 1 | Flickr |
| Black-footed ferret | Mustela nigripes 2 | Flickr |
| Black-footed ferret | Mustela nigripes 3 | Flickr |
| Black-footed ferret | Mustela nigripes 4 | Nature Picture Library |
| Black-footed ferret | Mustela nigripes 5 | Nature Picture Library |
| Black-footed ferret | Mustela nigripes 6 | Arkive |
| Least weasel | Mustela nivalis 1 | Nature Picture Library |
| Least weasel | Mustela nivalis 10 | Biolib |
| Least weasel | Mustela nivalis 2 | Nature Picture Library |
| Least weasel | Mustela nivalis 3 | Nature Picture Library |
| Least weasel | Mustela nivalis 4 | Nature Picture Library |
| Least weasel | Mustela nivalis 5 | Nature Picture Library |
| Least weasel | Mustela nivalis 6 | Nature Picture Library |
| Least weasel | Mustela nivalis 7 | Nature Picture Library |
| Least weasel | Mustela nivalis 8 | Arkive |
| Least weasel | Mustela nivalis 9 | Biolib |
| Least weasel | Mustela nivalis Transition 1 | Flickriver |
| Least weasel | Mustela nivalis T2 | Flickr |
| Least weasel | Mustela nivalis W1 | Flickr |
| Least weasel | Mustela nivalis W2 | Flickr |
| Least weasel | Mustela nivalis W3 | http://www.inaturalist.org/photos/639306 |
| Least weasel | Mustela nivalis W4 | Flickr |
| Malaysian weasel | Mustela nudipes 1 | http://www.planet-mammiferes.org/Photos/Carniv/Mustelid/MustNud1.jpg, |
| Malaysian weasel | Mustela nudipes 2 | http://www.all-about-ferrets.com/images/MalayanWeasel.jpg, |
| European polecat | Mustela putorius 1 | Getty Images |
| European polecat | Mustela putorius 2 | Arkive |
| European polecat | Mustela putorius 3 | Encyclopedia of Life |
| European polecat | Mustela putorius 4 | Encyclopedia of Life |
| Siberian weasel | Mustela sibirica 1 | Biolib |
| Siberian weasel | Mustela sibirica 2 | Flickr |
| Siberian weasel | Mustela sibirica 3 | Flickr |
| Stripe-backed weasel | Mustela strigidorsa 1 | Encyclopedia of Life |
| Indonesian stink badger | Mydaus javanensis 1 | http://www.safeproject.net/animal-sightings/malay-badger-mydaus-javanensis/ |
| Indonesian stink badger | Mydaus javanensis 2 | http://1.bp.blogspot.com/-VWs7O5XAZDE/UJXocXnmrqI/AAAAAAAAAk8/2XJBHXh5O74/s1600/hspring+(1).JPG, |
| Indonesian stink badger | Mydaus javanensis 3 | http://mongabay-images.s3.amazonaws.com/12/1120stinkbadger2.jpg, |
| Indonesian stink badger | Mydaus javanensis 4 | https://encrypted-tbn0.gstatic.com/images?q=tbn:ANd9GcQCzpJRo5OElPoagtdd2OeoFKByCpf2MksXop89FOzMHnraKXk-Jg, |
| Palawin stink badger | Mydaus marchei 1 | Arkive |
| American mink | Neovison vison 1 | Flickr |
| American mink | Neovison vison 2 | Flickr |
| American mink | Neovison vison 3 | Encyclopedia of Life |
| American mink | Neovison vison 4 | Encyclopedia of Life |
| American mink | Neovison vison 5 | Arkive |
| American mink | Neovison vison 6 | Flickr |
| American mink | Neovison vison 7 | Flickr |
| African striped weasel | Poecilogale albinucha 1 | Arkive |
| Giant otter | Pteronura brasiliensis 1 | Nature Picture Library |
| Giant otter | Pteronura brasiliensis 2 | Nature Picture Library |
| Giant otter | Pteronura brasiliensis 3 | Encyclopedia of Life |
| Giant otter | Pteronura brasiliensis 4 | Nature Picture Library |
| Giant otter | Pteronura brasiliensis 5 | Arkive |
| American badger | Taxidea taxus 1 | Arkive |
| American badger | Taxidea taxus 2 | Encyclopedia of Life |
| American badger | Taxidea taxus 3 | Flickr |
| American badger | Taxidea taxus 4 | Flickr |
| American badger | Taxidea taxus 5 | Flickr |
| Striped polecat | Vormela peregusna 1 | https://fotki.yandex.ru/next/users/usikn/album/62295/view/168523 |
| Striped polecat | Vormela peregusna 2 | Flickr |
| Striped polecat | Vormela peregusna 3 | http://www.earthflora.ru/wp-content/uploads/2012/perevyazka-ili-xor-perevyazka-vormela-peregusna_1.jpg, |
| African palm civet | Nandinia binotata 1 | Arkive |
| African palm civet | Nandinia binotata 2 | Arkive |
| African palm civet | Nandinia binotata 3 | Nature Picture Library |
| African palm civet | Nandinia binotata 4 | Nature Picture Library |
| African palm civet | Nandinia binotata 5 | http://e360.yale.edu/images/slideshows/N.-binotata-600.jpg, |
| Eastern lowland olingo | Bassaricyon alleni 1 | Nature Picture Library |
| Olingos (Northern olingo) | Bassaricyon gabbii 1 | Arkive |
| Olingos (Northern olingo) | Bassaricyon gabbii 2 | Arkive |
| Olingos (Northern olingo) | Bassaricyon gabbii 3 | http://www.ontfin.com/Word/wp-content/uploads/2013/03/Kinkajou7.jpg, |
| Olingos (Northern olingo) | Bassaricyon gabbii 4 | Zoochat |
| Olingos (Northern olingo) | Bassaricyon gabbii 5 | Zoochat |
| Ringtail | Bassariscus astutus 1 | Arkive |
| Ringtail | Bassariscus astutus 2 | Arkive |
| Ringtail | Bassariscus astutus 3 | Biolib |
| Ringtail | Bassariscus astutus 4 | Mammal Image Library |
| Ringtail | Bassariscus astutus 5 | Mammal Image Library |
| Ringtail | Bassariscus astutus 7 | Nature Picture Library |
| Ringtail | Bassariscus astutus 8 | http://library.sandiegozoo.org/factsheets/ringtail/images/ringtail_sideview.jpg, |
| Cacomistle | Bassariscus sumichrasti 1 | Encyclopedia of Life |
| White-nosed coati | Nasua narica 1 | Nature Picture Library |
| White-nosed coati | Nasua narica 2 | Nature Picture Library |
| White-nosed coati | Nasua narica 3 | Nature Picture Library |
| White-nosed coati | Nasua narica 4 | Encyclopedia of Life |
| White-nosed coati | Nasua narica 5 | Biolib |
| White-nosed coati | Nasua narica 6 | Arkive |
| White-nosed coati | Nasua narica 7 | Animal Diversity Web |
| Brown-nosed coati | Nasua nasua 1 | Biolib |
| Brown-nosed coati | Nasua nasua 10 | Encyclopedia of Life |
| Brown-nosed coati | Nasua nasua 2 | Biolib |
| Brown-nosed coati | Nasua nasua 3 | Biolib |
| Brown-nosed coati | Nasua nasua 4 | Biolib |
| Brown-nosed coati | Nasua nasua 5 | Encyclopedia of Life |
| Brown-nosed coati | Nasua nasua 6 | Encyclopedia of Life |
| Brown-nosed coati | Nasua nasua 7 | Encyclopedia of Life |
| Brown-nosed coati | Nasua nasua 9 | Encyclopedia of Life |
| Mountain Coati | Nasuella olivacea 1 | Arkive |
| Kinkajou | Potos flavus 1 | Animals and Earth |
| Kinkajou | Potos flavus 2 | Animals and Earth |
| Kinkajou | Potos flavus 3 | Arkive |
| Kinkajou | Potos flavus 4 | Flickr |
| Kinkajou | Potos flavus 5 | Flickr |
| Kinkajou | Potos flavus 6 | Flickr |
| Crab-eating raccoon | Procyon cancrivorus 1 | Encyclopedia of Life |
| Crab-eating raccoon | Procyon cancrivorus 2 | Encyclopedia of Life |
| Crab-eating raccoon | Procyon cancrivorus 3 | Flickr |
| Crab-eating raccoon | Procyon cancrivorus 4 | Flickr |
| Crab-eating raccoon | Procyon cancrivorus 5 | Nature Picture Library |
| Crab-eating raccoon | Procyon cancrivorus 6 | http://www.procarnivoros.org.br/arquivos/fotosa/46/20100120_153223.jpg, |
| Crab-eating raccoon | Procyon cancrivorus 7 | Zoochat |
| Racoon | Procyon lotor 1 | Animals and Earth |
| Racoon | Procyon lotor 10 | Encyclopedia of Life |
| Racoon | Procyon lotor 2 | Biolib |
| Racoon | Procyon lotor 3 | Flickr |
| Racoon | Procyon lotor 4 | Flickr |
| Racoon | Procyon lotor 5 | Flickr |
| Racoon | Procyon lotor 6 | Nature Picture Library |
| Racoon | Procyon lotor 7 | Nature Picture Library |
| Racoon | Procyon lotor 8 | Mammals of Up Yonda Farm |
| Racoon | Procyon lotor 9 | http://a133.idata.over-blog.com/3/03/14/36/mammiferes/raton-laveur-03.jpg, |
| Ethiopian Dwarf Mongoose | Helogale hirtula 1 | Arkive |
| Binturong | Arctictis binturong 1 | Flickr |
| Binturong | Arctictis binturong 10 | Arkive |
| Binturong | Arctictis binturong 2 | Flickr |
| Binturong | Arctictis binturong 3 | Flickr |
| Binturong | Arctictis binturong 4 | Flickr |
| Binturong | Arctictis binturong 5 | Flickr |
| Binturong | Arctictis binturong 6 | Flickr |
| Binturong | Arctictis binturong 7 | Flickr |
| Binturong | Arctictis binturong 8 | Flickr |
| Binturong | Arctictis binturong 9 | Flickr |
| Small-toothed or Three-striped Palm Civet | Arctogalidia trivirgata 1 | Flickr |
| Small-toothed or Three-striped Palm Civet | Arctogalidia trivirgata 2 | Flickr |
| Owston's Palm Civet | Chrotogale owstoni 1 | Nature Picture Library |
| Owston's Palm Civet | Chrotogale owstoni 2 | Tumblr |
| Owston's Palm Civet | Chrotogale owstoni 3 | http://zooinstitutes.com/zoosrating/images/70.jpg, |
| Owston's Palm Civet | Chrotogale owstoni 4 | Biolib |
| African Civet | Civettictis civetta 1 | Biolib |
| African Civet | Civettictis civetta 2 | Biolib |
| African Civet | Civettictis civetta 3 | Encyclopedia of Life |
| African Civet | Civettictis civetta 4 | Flickr |
| African Civet | Civettictis civetta 5 | Flickr |
| African Civet | Civettictis civetta 6 | Flickr |
| Otter Civet | Cynogale bennetti 1 | http://photos.mongabay.com/j/ConCaSa5.568.JPG, |
| Angolan Genet | Genetta angolensis 1 | http://lis-upmc.snv.jussieu.fr/genettes/web/fiches_en/images/Genang_Mozambique2.jpg, |
| Angolan Genet | Genetta angolensis 2 | Carnivora Forum |
| Genet | Genetta genetta 1 | Biolib |
| Genet | Genetta genetta 2 | Biolib |
| Genet | Genetta genetta 3 | Encyclopedia of Life |
| Genet | Genetta genetta 4 | Encyclopedia of Life |
| Genet | Genetta genetta 5 | Nature Picture Library |
| Genet | Genetta genetta 6 | Carnivora Forum |
| Johnston's genet | Genetta johnstoni 1 | http://lis-upmc.snv.jussieu.fr/xper2/basesHtml/genettes_en/web/images/Genjoh_Ivory_Coast.jpg, |
| Rusty-spotted Genet | Genetta maculata 1 | Nature Picture Library |
| Pardine Genet | Genetta pardina 1 | http://zooinstitutes.com/animals/11397.jpg, |
| Servaline Genet | Genetta servalina 1 | Animals and Earth |
| Haussa Genet | Genetta thierryi | Biolib |
| Cape Genet | Genetta tigrana 1 | Nature Picture Library |
| Cape Genet | Genetta tigrana 2 | Arkive |
| Cape Genet | Genetta tigrana 3 | Arkive |
| Cape Genet | Genetta tigrana 4 | Arkive |
| Cape Genet | Genetta tigrana 5 | Arkive |
| Masked Palm Civet | Paguma larvata 1 | Nature Picture Library |
| Masked Palm Civet | Paguma larvata 2 | Biolib |
| Palm Civet | Paradoxurus hermaphroditus 1 | Nature Picture Library |
| Palm Civet | Paradoxurus hermaphroditus 2 | Biolib |
| Palm Civet | Paradoxurus hermaphroditus 3 | Encyclopedia of Life |
| Palm Civet | Paradoxurus hermaphroditus 4 | Biolib |
| Palm Civet | Paradoxurus hermaphroditus 5 | Biolib |
| Palm Civet | Paradoxurus hermaphroditus 6 | Encyclopedia of Life |
| Brown Palm Civet | Paradoxurus jerdoni 1 | Arkive |
| Brown Palm Civet | Paradoxurus jerdoni 2 | Encyclopedia of Life |
| Banded Linsang | Prionodon linsang 1 | Arkive |
| Banded Linsang | Prionodon linsang 2 | Arkive |
| Spotted Linsang | Prionodon pardicolor 1 | Arkive |
| Spotted Linsang | Prionodon pardicolor 2 | Carnivora Forum |
| Malayan Civet | Viverra tangalunga 1 | Nature Picture Library |
| Malayan Civet | Viverra tangalunga 2 | Nature Picture Library |
| Large Indian Civet | Viverra zibetha 1 | Arkive |
| Small Indian Civet - Lesser Oriental Civet - Rasse | Viverricula indica 1 | Arkive |

| **Bear Sides** | | |
| --- | --- | --- |
| **Species Common name** | **Photo** | **Source** |
| Giant panda | Ailuropoda melanoleuca 1 | Animals and Earth |
| Giant panda | Ailuropoda melanoleuca 2 | Biolib |
| Giant panda | Ailuropoda melanoleuca 3 | Encyclopedia of Life |
| Giant panda | Ailuropoda melanoleuca 4 | Flickr |
| Giant panda | Ailuropoda melanoleuca 5 | Flickr |
| Giant panda | Ailuropoda melanoleuca 6 | Flickr |
| Giant panda | Ailuropoda melanoleuca 7 | Nature Picture Library |
| Giant panda | Ailuropoda melanoleuca 8 | Nature Picture Library |
| Quinling panda | Ailuropoda melanoleuca quinling 1 | Carnivora Forum |
| Quinling panda | Ailuropoda melanoleuca quinling 2 | Minden Pictures |
| Sun Bear | Helarctos malayanus euryspulus 1 | Biolib |
| Sun Bear | Helarctos malayanus euryspulus 2 | Encyclopedia of Life |
| Sun Bear | Helarctos malayanus euryspulus 3 | Nature Picture Library |
| Sun Bear | Helarctos malayanus euryspulus 4 | Nature Picture Library |
| Sloth Bear | Melursus ursinus inornatus 1 | Biolib |
| Sloth Bear | Melursus ursinus ursinus 1 | Biolib |
| Sloth Bear | Melursus ursinus ursinus 2 | Biolib |
| Sloth Bear | Melursus ursinus ursinus 3 | Biolib |
| Andean bear | Tremarctos ornatus 1 | Nature Picture Library |
| Andean bear | Tremarctos ornatus 2 | Nature Picture Library |
| Andean bear | Tremarctos ornatus 3 | Nature Picture Library |
| Andean bear | Tremarctos ornatus 4 | Nature Picture Library |
| Andean bear | Tremarctos ornatus 7 | Nature Picture Library |
| Black bear | Ursinus americanus vancouveri 1 | Nature Picture Library |
| Black bear | Ursinus americanus vancouveri 2 | Nature Picture Library |
| Black bear | Ursinus americanus vancouveri 3 | Flickr |
| Black bear | Ursinus americanus vancouveri 4 | Flickr |
| Black bear | Ursinus americanus vancouveri 5 | Flickr |
| Black bear | Ursis americanus americanus 16704 | ROM museum |
| Black bear | Ursus americanus altifrontalis 1 | Nature Picture Library |
| Black bear | Ursus americanus altifrontalis 2 | Flickr |
| Black bear | Ursus americanus altifrontalis 3 | Flickr |
| Black bear | Ursus americanus amblyceps 1 | Biolib |
| Black bear | Ursus americanus amblyceps 2 | Encyclopedia of Life |
| Black bear | Ursus americanus amblyceps 3 | Flickr |
| Black bear | Ursus americanus americanus 1 | Nature Picture Library |
| Black bear | Ursus americanus americanus 2 | Nature Picture Library |
| Black bear | Ursus americanus americanus 3 | Nature Picture Library |
| Black bear | Ursus americanus americanus 4 | Nature Picture Library |
| Black bear | Ursus americanus americanus 5 | Nature Picture Library |
| Black bear | Ursus americanus californiensis 1 | Flickr |
| Black bear | Ursus americanus carlottae 1 | Flickr |
| Black bear | Ursus americanus cinnamonum 1 | Nature Picture Library |
| Black bear | Ursus americanus cinnamonum 2 | Nature Picture Library |
| Black bear | Ursus americanus cinnamonum 3 | Flickr |
| Black bear | Ursus americanus cinnamonum 4 | Flickr |
| Black bear | Ursus americanus cinnamonum 5 (NPL UNNAMED) | Nature Picture Library |
| Black bear | Ursus americanus emmonsii 3609180285 | ROM museum |
| Black bear | Ursus americanus emonsii 1 | Flickr |
| Black bear | Ursus americanus eremicus 1 | Nature Picture Library |
| Black bear | Ursus americanus eremicus 2 | Flickr |
| Black bear | Ursus americanus eremicus 3 | Flickr |
| Black bear | Ursus americanus floridanus 1 | Flickr |
| Black bear | Ursus americanus floridanus 2 | Flickr |
| Black bear | Ursus americanus floridanus 3 | Flickr |
| Black bear | Ursus americanus floridanus 4 | Bears of the World |
| Black bear | Ursus americanus floridanus 6 | floridanature.org |
| Black bear | Ursus americanus hamiltoni 1 | DECEASED-http://www.canadatrophyhunting.com/Destinations/Pine_Ridge_Lodge/ |
| Black bear | Ursus americanus hamiltoni 2 | Deceased-http://nfsales.no-ip.biz/whitefeatherlodge/bear.html |
| Black bear | Ursus americanus hamiltoni 3 | Deceased-http://nfsales.no-ip.biz/whitefeatherlodge/bear.html |
| Black bear | Ursus americanus kermodei 1 LIGHT | Nature Picture Library |
| Black bear | Ursus americanus kermodei 2 LIGHT | Nature Picture Library |
| Black bear | Ursus americanus kermodei 3 DARK | Nature Picture Library |
| Black bear | Ursus americanus kermodei 4 LIGHT | Nature Picture Library |
| Black bear | Ursus americanus kermodei 5 LIGHT | Nature Picture Library |
| Black bear | Ursus americanus luteolus 1 | http://www.wlf.louisiana.gov/american-black-bear |
| Black bear | Ursus americanus luteolus 2 | https://www.lakeforest.edu/academics/programs/environmental/courses/seniorseminar/2015/students/mone.php |
| Black bear | Ursus americanus luteolus 3 | Biolib |
| Black bear | Ursus americanus luteolus 4 | Fish and Wildlife Services https://www.fws.gov/endangered/map/ESA_success_stories/LA/LA_story1/ |
| Black bear | Ursus americanus luteolus 5 | Fish and Wildlife Services https://www.fws.gov/lafayette/pdc/ |
| Black bear | Ursus americanus perniger 1 | https://www.inaturalist.org/observations/2655412 |
| Black bear | Ursus americanus perniger 2 | http://www.wildnatureimages.com/Black%20Bear%20Sow%20H.htm |
| Black bear | Ursus americanus perniger 3 | http://peninsulaclarion.com/outdoors/2012-03-16/new-drawing-system-for-black-bear-baiting-permits |
| Black bear | Ursus americanus perniger 4 | http://www.wildnatureimages.com/Black_Bear_Pictures.htm |
| Black bear | Ursus americanus pugnax 1 | http://www.thetelegram.com/News/Regional/2014-10-09/article-3897562/Black-bears-reported-near-populated-areas-of-western-Newfoundland/1 |
| Black bear | Ursus americanus pugnax 2 | http://www.hunting-newfoundland.com/black-bear-pictures-123-pictures.htm |
| Black bear | Ursus arctos alascensis 3609180286 | ROM museum |
| Brown bear | Ursus arctos arctos 1 | Nature Picture Library |
| Brown bear | Ursus arctos arctos 175687 | NMNH museum |
| Brown bear | Ursus arctos arctos 2 | Nature Picture Library |
| Brown bear | Ursus arctos arctos 3 | Nature Picture Library |
| Brown bear | Ursus arctos arctos 4 | Nature Picture Library |
| Brown bear | Ursus arctos arctos 5 | Nature Picture Library |
| Brown bear | Ursus arctos arctos 6 | Nature Picture Library |
| Brown bear | Ursus arctos arctos 7 | Nature Picture Library |
| Brown bear | Ursus arctos beringianus 1 | Nature Picture Library |
| Brown bear | Ursus arctos beringianus 2 | Nature Picture Library |
| Brown bear | Ursus arctos beringianus 3 | Nature Picture Library |
| Brown bear | Ursus arctos beringianus 4 | Nature Picture Library |
| Brown bear | Ursus arctos beringianus 5 | Nature Picture Library |
| Brown bear | Ursus arctos beringianus 6 | Nature Picture Library |
| Brown bear | Ursus arctos beringianus 7 | Nature Picture Library |
| Brown bear | Ursus arctos beringianus 8 | Biolib |
| Brown bear | Ursus arctos collaris 1 | Bears of the World |
| Brown bear | Ursus arctos collaris 2 | Bears of the World |
| Brown bear | Ursus arctos dalli 1 | http://www.planet-mammiferes.org/drupal/en/node/40?indice2=Photos%2FCarniv%2FUrsides%2FBrunAla1.jpg |
| Brown bear | Ursus arctos gobiensis 1 | Nature Picture Library |
| Brown bear | Ursus arctos gyas 1 | alamy stock photo |
| Brown bear | Ursus arctos horriblis 1 | Nature Picture Library |
| Brown bear | Ursus arctos horriblis 2 | Nature Picture Library |
| Brown bear | Ursus arctos horriblis 23409 | ROM museum |
| Brown bear | Ursus arctos horriblis 3 | Nature Picture Library |
| Brown bear | Ursus arctos horriblis 4 | Nature Picture Library |
| Brown bear | Ursus arctos horriblis 5 | Nature Picture Library |
| Brown bear | Ursus arctos horriblis 6 | Nature Picture Library |
| Brown bear | Ursus arctos horriblis 7 | Nature Picture Library |
| Brown bear | Ursus arctos horriblis 8 | Nature Picture Library |
| Brown bear | Ursus arctos horriblis 9 | Nature Picture Library |
| Brown bear | Ursus arctos isabellinus 1 | http://zooinstitutes.com/zoosrating/animal.asp?name=839 |
| Brown bear | Ursus arctos isabellinus 2 | shutterstock |
| Brown bear | Ursus arctos isabellinus 21691 | NMNH museum |
| Brown bear | Ursus arctos isabellinus 3 BOTTOM BEAR | http://www.zoochat.com/859/himalayan-brown-bear-chengdu-zoo-2012-a-271725/ |
| Brown bear | Ursus arctos isabellinus 3 TOP BEAR | http://www.zoochat.com/859/himalayan-brown-bear-chengdu-zoo-2012-a-271725/ |
| Brown bear | Ursus arctos isabellinus 4 | Biolib |
| Brown bear | Ursus arctos lasiotus 1 DARK | http://zooinstitutes.com/animal.asp?name=2412 |
| Brown bear | Ursus arctos lasiotus 199683 DARK | NMNH museum |
| Brown bear | Ursus arctos lasiotus 2 DARK | http://zooinstitutes.com/animal.asp?name=2412 |
| Brown bear | Ursus arctos lasiotus 4 LIGHT | National Geographic |
| Brown bear | Ursus arctos middendorffi 1 | Nature Picture Library |
| Brown bear | Ursus arctos middendorffi 2 | Nature Picture Library |
| Brown bear | Ursus arctos middendorffi 3 | Nature Picture Library |
| Brown bear | Ursus arctos middendorffi 4 | Nature Picture Library |
| Brown bear | Ursus arctos middendorffi 5 | Nature Picture Library |
| Brown bear | Ursus arctos middendorffi 6 | Nature Picture Library |
| Brown bear | Ursus arctos middendorffi 7 | Nature Picture Library |
| Brown bear | Ursus arctos middendorffi 8 | Biolib |
| Brown bear | Ursus arctos pruinosis 1 LEFT | Zoochat http://www.zoochat.com/859/tibetan-blue-bears-ursus-arctos-pruinosus-348075/ |
| Brown bear | Ursus arctos pruinosis 1 RIGHT | Zoochat http://www.zoochat.com/859/tibetan-blue-bears-ursus-arctos-pruinosus-348075/ |
| Brown bear | Ursus arctos pruinosis 199030 | NMNH museum |
| Brown bear | Ursus arctos pruinosis 2 | Bears of the World |
| Brown bear | Ursus arctos sitkeenensis 91290 | ROM museum |
| Brown bear | Ursus arctos sitkensis 273076 | NMNH museum |
| Brown bear | Ursus arctos syriacus 1 | Biolib |
| Brown bear | Ursus arctos syriacus 2 | Bears of the World |
| Brown bear | Ursus arctos syriacus 3 LEFT | Bears of the World |
| Brown bear | Ursus arctos syriacus 3609180264 | ROM museum |
| Polar bear | Ursus maritimus 1 | Nature Picture Library |
| Polar bear | Ursus maritimus 2 | Nature Picture Library |
| Polar bear | Ursus maritimus 3 | Nature Picture Library |
| Polar bear | Ursus maritimus 4 | Nature Picture Library |
| Polar bear | Ursus maritimus 5 | Nature Picture Library |
| Polar bear | Ursus maritimus 6 | Nature Picture Library |
| Polar bear | Ursus maritimus 7 | Nature Picture Library |
| Asiatic black bear | Ursus thibetanus formosanus 1 | Bears of the World |
| Asiatic black bear | Ursus thibetanus formosanus 2 | Bears of the World |
| Asiatic black bear | Ursus thibetanus formosanus 3 | Tree of Life Web Project http://tolweb.org/Ursus_thibetanus/123668 |
| Asiatic black bear | Ursus thibetanus gedrosianus 1 | Wikipedia |
| Asiatic black bear | Ursus thibetanus gedrosianus 2 | iran-airrifle http://www.iran-airrifle.com/forum/printthread.php?tid=752&page=2 (other places online as well) |
| Asiatic black bear | Ursus thibetanus gedrosianus 4 | wildlife nature_knoji_com https://wildlife-nature.knoji.com/the-endangered-bear-species-of-the-world/ |
| Asiatic black bear | Ursus thibetanus gedrosianus 5 | WWF |
| Asiatic black bear | Ursus thibetanus japonicus 1 | Bears of the World |
| Asiatic black bear | Ursus thibetanus japonicus 2 | Bears of the World |
| Asiatic black bear | Ursus thibetanus laniger 2 | Bears of the World |
| Asiatic black bear | Ursus thibetanus laniger 4 | Manimal World http://www.manimalworld.net/pages/ursides/ours-noir-de-l-himalaya.html |
| Asiatic black bear | Ursus thibetanus laniger 5 | Manimal World http://www.manimalworld.net/pages/ursides/ours-noir-de-l-himalaya.html |
| Asiatic black bear | Ursus thibetanus laniger 6 | Manimal World http://www.manimalworld.net/pages/ursides/ours-noir-de-l-himalaya.html |
| Asiatic black bear | Ursus thibetanus mupinensis 2 | Biolib |
| Asiatic black bear | Ursus thibetanus ussuricus 1 | Biolib |
| Asiatic black bear | Ursus thibetanus ussuricus 2 | Zooinstitutes |

| **Carnivore Faces** | | |
| --- | --- | --- |
| **Species Common name** | **Photo** | **Source** |
| Red panda | Ailurus fulgens 1 | Nature Picture Library |
| Red panda | Ailurus fulgens 10 | Flickr |
| Red panda | Ailurus fulgens 2 | Nature Picture Library |
| Red panda | Ailurus fulgens 3 | Nature Picture Library |
| Red panda | Ailurus fulgens 4 | Nature Picture Library |
| Red panda | Ailurus fulgens 5 | Nature Picture Library |
| Red panda | Ailurus fulgens 6 | Nature Picture Library |
| Red panda | Ailurus fulgens 7 | Nature Picture Library |
| Red panda | Ailurus fulgens 8 | Flickr |
| Red panda | Ailurus fulgens 9 | Flickr |
| Short-eared dog | Atelocynus microtis 1 | http://video.nationalgeographic.com/video/player/media/elusive-short-eared-amazon-dog/elusive-short-eared-amazon-dog_480x360.jpg, |
| Short-eared dog | Atelocynus microtis 2 | http://zoologia.puce.edu.ec/Vertebrados/Recursos/imagen/Mammalia/Atelocynus |
| Short-eared dog | Atelocynus microtis 3 | Science Photo Library |
| Short-eared dog | Atelocynus microtis 3S | Science Photo Library |
| Short-eared dog | Atelocynus microtis 4 | Carnivora Forum |
| Short-eared dog | Atelocynus microtis 5 | Flickr |
| Side-striped jackal | Canis adustus 1 | Nature Picture Library |
| Side-striped jackal | Canis adustus 2 | Nature Picture Library |
| Side-striped jackal | Canis adustus S5 | Nature Picture Library |
| Golden jackal | Canis aureus 1 | Nature Picture Library |
| Golden jackal | Canis aureus 12S | Encyclopedia of Life |
| Golden jackal | Canis aureus 14S | Encyclopedia of Life |
| Golden jackal | Canis aureus 1S | Nature Picture Library |
| Golden jackal | Canis aureus 2 | Nature Picture Library |
| Golden jackal | Canis aureus 3 | Nature Picture Library |
| Golden jackal | Canis aureus 5S | Nature Picture Library |
| Golden jackal | Canis aureus bea 10S | Encyclopedia of Life |
| Golden jackal | Canis aureus naria 13S | Encyclopedia of Life |
| Coyote | Canis latrans 1 | Nature Picture Library |
| Coyote | Canis latrans 2 | Nature Picture Library |
| Coyote | Canis latrans 3 | Nature Picture Library |
| Coyote | Canis latrans 4 | Nature Picture Library |
| Coyote | Canis latrans 5 | Nature Picture Library |
| Coyote | Canis latrans 6 | Nature Picture Library |
| Coyote | Canis latrans 7 | Arkive |
| Grey wolf | Canis lupus baileyi 1 | Nature Picture Library |
| Grey wolf | Canis lupus 2 | Nature Picture Library |
| Grey wolf | Canis lupus 4 | Nature Picture Library |
| Grey wolf | Canis lupus 5 | Nature Picture Library |
| Grey wolf | Canis lupus 6 | Nature Picture Library |
| Grey wolf | Canis lupus 7 | Nature Picture Library |
| Grey wolf | Canis lupus 8 | Nature Picture Library |
| Grey wolf | Canis lupus 9 | Nature Picture Library |
| Grey wolf | Canis lupus signatus 3 | Nature Picture Library |
| Black-backed Jackal | Canis mesomelas 1 | Nature Picture Library |
| Black-backed Jackal | Canis mesomelas 2 | Nature Picture Library |
| Black-backed Jackal | Canis mesomelas 3 | Nature Picture Library |
| Black-backed Jackal | Canis mesomelas 4 | Nature Picture Library |
| Black-backed Jackal | Canis mesomelas 5 | Nature Picture Library |
| Black-backed Jackal | Canis mesomelas 6 | Nature Picture Library |
| Black-backed Jackal | Canis mesomelas 7 | Nature Picture Library |
| Red Wolf | Canis lupus rufus 1 | Nature Picture Library |
| Red Wolf | Canis lupus rufus S1 | Arkive |
| Red Wolf | Canis lupus rufus S2 | Arkive |
| Red Wolf | Canis lupus rufus S3 | Nature Picture Library |
| Red Wolf | Canis lupus rufus S5 | Nature Picture Library |
| Simian Jackal, Ethiopian Wolf | Canis simensis 1 | Nature Picture Library |
| Simian Jackal, Ethiopian Wolf | Canis simensis 2 | Arkive |
| Simian Jackal, Ethiopian Wolf | Canis simensis S12 | Biolib |
| Simian Jackal, Ethiopian Wolf | Canis simensis S4 | Nature Picture Library |
| Simian Jackal, Ethiopian Wolf | Canis simensis S8 | Flickr |
| Simian Jackal, Ethiopian Wolf | Canis simensis S9 | Flickr |
| Maned Wolf | Chrysocyon brachyurus 1 | Arkive |
| Maned Wolf | Chrysocyon brachyurus 2 | Encyclopedia of Life |
| Maned Wolf | Chrysocyon brachyurus 3 | Nature Picture Library |
| Maned Wolf | Chrysocyon brachyurus 4 | Nature Picture Library |
| Maned Wolf | Chrysocyon brachyurus 5 | Nature Picture Library |
| Maned Wolf | Chrysocyon brachyurus 6 | Science Photo Library |
| Dhole | Cuon alpinus 1 | Nature Picture Library |
| Dhole | Cuon alpinus 2 | Nature Picture Library |
| Dhole | Cuon alpinus 3 | Nature Picture Library |
| Dhole | Cuon alpinus 4 | Nature Picture Library |
| Dhole | Cuon alpinus 5 | Nature Picture Library |
| South American fox | Lycalopex culpaeus 1 | Arkive |
| South American fox | Lycalopex culpaeus 2 | Encyclopedia of Life |
| South American fox | Lycalopex culpaeus S1 | Nature Picture Library |
| South American fox | Lycalopex culpaeus S10 | Flickr |
| South American fox | Lycalopex culpaeus S11 | Flickr |
| Pampas fox | Lycalopex gymnocercus S1 | Nature Picture Library |
| Pampas fox | Lycalopex gymnocercus S2 | Arkive |
| Pampas fox | Lycalopex gymnocercus S3 | Carnivora Forum |
| Sechuran fox | Lycalopex sechurae S1 | Nature Picture Library |
| Sechuran fox | Lycalopex sechurae S2 | Animals and Earth |
| Hoary Fox | Lycalopex vetulus S1 | http://www.procarnivoros.org.br/arquivos/fotosa/33/20100105_094501.jpg |
| Hoary Fox | Lycalopex vetulus S2 | Flickr |
| Darwin's fox | Lycalopex fulvipes 1 | Arkive |
| Darwin's fox | Lycalopex fulvipes 2 | Arkive |
| Darwin's fox | Lycalopex fulvipes 3 | Arkive |
| Darwin's fox | Lycalopex fulvipes 4 | Nature Picture Library |
| Darwin's fox | Lycalopex fulvipes 5 | Wikimedia Commons |
| South American Grey Fox | Lycalopex griseus 1 | Arkive |
| South American Grey Fox | Lycalopex griseus 2 | Nature Picture Library |
| South American Grey Fox | Lycalopex griseus 3 | Science Photo Library |
| Pampas Fox | Lycalopex gymnocercus 1 | Arkive |
| Pampas Fox | Lycalopex gymnocercus 2 | Arkive |
| Sechuran Fox | Lycalopex sechurae 1 | Getty Images |
| Sechuran Fox | Lycalopex sechurae 2 | Nature Picture Library |
| Sechuran Fox | Lycalopex sechurae 3 | Nature Picture Library |
| Hoary Fox | Lycalopex vetulus 1 | Nature Picture Library |
| African Hunting Dog | Lycaon pictus 1 | Nature Picture Library |
| African Hunting Dog | Lycaon pictus 2 | Nature Picture Library |
| African Hunting Dog | Lycaon pictus 3 | Nature Picture Library |
| African Hunting Dog | Lycaon pictus 4 | Nature Picture Library |
| African Hunting Dog | Lycaon pictus 5 | Nature Picture Library |
| African Hunting Dog | Lycaon pictus 6 | Nature Picture Library |
| Raccoon dog | Nyctereutes procyonoides 1 | Encyclopedia of Life |
| Raccoon dog | Nyctereutes procyonoides 2 | Encyclopedia of Life |
| Raccoon dog | Nyctereutes procyonoides 3 | Encyclopedia of Life |
| Raccoon dog | Nyctereutes procyonoides 4 | Encyclopedia of Life |
| Raccoon dog | Nyctereutes procyonoides 5 | Nature Picture Library |
| Raccoon dog | Nyctereutes procyonoides 6 | Nature Picture Library |
| Bat-eared fox | Otocyon megalotis 1 | Nature Picture Library |
| Bat-eared fox | Otocyon megalotis 2 | Nature Picture Library |
| Bat-eared fox | Otocyon megalotis 3 | Nature Picture Library |
| Bat-eared fox | Otocyon megalotis 4 | Nature Picture Library |
| Bat-eared fox | Otocyon megalotis 5 | Nature Picture Library |
| Bat-eared fox | Otocyon megalotis 6 | Nature Picture Library |
| Bush Dog | Speothos venaticus 1 | Arkive |
| Bush Dog | Speothos venaticus 2 | Encyclopedia of Life |
| Bush Dog | Speothos venaticus 3 | Encyclopedia of Life |
| Bush Dog | Speothos venaticus 4 | Encyclopedia of Life |
| Gray Fox | Urocyon cinereoargenteus 1 | Nature Picture Library |
| Gray Fox | Urocyon cinereoargenteus 2 | Nature Picture Library |
| Gray Fox | Urocyon cinereoargenteus 3 | Nature Picture Library |
| Gray Fox | Urocyon cinereoargenteus 4 | Encyclopedia of Life |
| Gray Fox | Urocyon cinereoargenteus 5 | Encyclopedia of Life |
| Island Fox | Urocyon littoralis 1 | Arkive |
| Island Fox | Urocyon littoralis 2 | Arkive |
| Island Fox | Urocyon littoralis 3 | http://www1.islandfox.org/2011/03/island-fox-happenings.html |
| Blanford's Fox | Vulpes cana 1 | Animal Diversity Web |
| Blanford's Fox | Vulpes cana 2 | Encyclopedia of Life |
| Cape Fox | Vulpes chama 1 | Nature Picture Library |
| Cape Fox | Vulpes chama 2 | Nature Picture Library |
| Cape Fox | Vulpes chama 3 | Arkive |
| Corsac Fox | Vulpes corsac 1 | Nature Picture Library |
| Corsac Fox | Vulpes corsac 2 | Nature Picture Library |
| Corsac Fox | Vulpes corsac 2S | Arkive |
| Corsac Fox | Vulpes corsac 3 | Nature Picture Library |
| Corsac Fox | Vulpes corsac 4 | Nature Picture Library |
| Corsac Fox | Vulpes corsac 5 | Nature Photo CZ |
| Tibetan Sand Fox | Vulpes ferrilata 1S | Flickr |
| Tibetan Sand Fox | Vulpes ferrilata 2S | Arkive |
| Tibetan Sand Fox | Vulpes ferrilata 3S | Nature Picture Library |
| Tibetan Sand Fox | Vulpes ferrilata 4S | Nature Picture Library |
| Arctic Fox | Vulpes lagopus 1 W | Nature Picture Library |
| Arctic Fox | Vulpes lagopus 10 S | Nature Picture Library |
| Arctic Fox | Vulpes lagopus 2 W | Nature Picture Library |
| Arctic Fox | Vulpes lagopus 3 W OR T | Nature Picture Library |
| Arctic Fox | Vulpes lagopus 4 T | Nature Picture Library |
| Arctic Fox | Vulpes lagopus 5 S | Nature Picture Library |
| Arctic Fox | Vulpes lagopus 6 S | Nature Picture Library |
| Arctic Fox | Vulpes lagopus 7 S | Nature Picture Library |
| Arctic Fox | Vulpes lagopus 8 T | Nature Picture Library |
| Arctic Fox | Vulpes lagopus 9 T | Nature Picture Library |
| Kit Fox | Vulpes macrotis 1 | Nature Picture Library |
| Kit Fox | Vulpes macrotis 2 | Nature Picture Library |
| Kit Fox | Vulpes macrotis 3 | Flickr |
| Kit Fox | Vulpes macrotis 4 | Flickr |
| Kit Fox | Vulpes macrotis 5 | Flickr |
| Sand Fox | Vulpes rueppellii 1 | Flickr |
| Red Fox | Vulpes vulpes 1 | Nature Picture Library |
| Red Fox | Vulpes vulpes 10 | Nature Picture Library |
| Red Fox | Vulpes vulpes 11 (silver morph) | Nature Picture Library |
| Red Fox | Vulpes vulpes 2 | Nature Picture Library |
| Red Fox | Vulpes vulpes 3 | Nature Picture Library |
| Red Fox | Vulpes vulpes 4 (transitioning to silver morph) | Nature Picture Library |
| Red Fox | Vulpes vulpes 5 | Nature Picture Library |
| Red Fox | Vulpes vulpes 6 | Nature Picture Library |
| Red Fox | Vulpes vulpes 7 | Nature Picture Library |
| Red Fox | Vulpes vulpes 8 | Nature Picture Library |
| Red Fox | Vulpes vulpes 9 | Nature Picture Library |
| Fennec Fox | Vulpes zerda 1 | Nature Picture Library |
| Fennec Fox | Vulpes zerda 2 | Flickr |
| Fennec Fox | Vulpes zerda 3 | Flickr |
| Fennec Fox | Vulpes zerda 4 | Flickr |
| Fennec Fox | Vulpes zerda 5 | Encyclopedia of Life |
| Fennec Fox | Vulpes zerda 6 | Encyclopedia of Life |
| Fennec Fox | Vulpes zerda 7 | Encyclopedia of Life |
| Fennec Fox | Vulpes zerda 8 | Arkive |
| Fossa | Cryptoprocta ferox 1 | Nature Picture Library |
| Fossa | Cryptoprocta ferox 2 | Nature Picture Library |
| Fossa | Cryptoprocta ferox 3 | Nature Picture Library |
| Fossa | Cryptoprocta ferox 4 | Nature Picture Library |
| Fossa | Cryptoprocta ferox 5 | Biolib |
| Fossa | Cryptoprocta ferox 6 | Biolib |
| Fossa | Cryptoprocta ferox 7 | Flickr |
| Fossa | Cryptoprocta ferox 8 | Flickr |
| Malagasy Civet | Fossa fossana 1 | Nature Picture Library |
| Malagasy Civet | Fossa fossana 2 | Flickr |
| Ring-tailed Mongoose | Galidia elegans 1 | Biolib |
| Ring-tailed Mongoose | Galidia elegans 10 | Nature Picture Library |
| Ring-tailed Mongoose | Galidia elegans 2 | Flickr |
| Ring-tailed Mongoose | Galidia elegans 3 | Flickr |
| Ring-tailed Mongoose | Galidia elegans 4 | Flickr |
| Ring-tailed Mongoose | Galidia elegans 5 | Flickr |
| Ring-tailed Mongoose | Galidia elegans 6 | Flickr |
| Ring-tailed Mongoose | Galidia elegans 7 | Flickr |
| Ring-tailed Mongoose | Galidia elegans 8 | Flickr |
| Ring-tailed Mongoose | Galidia elegans 9 | Flickr |
| Malagasy Narrow-striped Mongoose | Mungotictis decemlineata 1 | Biolib |
| Malagasy Brown-tailed Mongoose (Salano) | Salanoia concolor S1 | Arkive |
| Cheetah | Acinonyx jubatus 1 | Nature Picture Library |
| Cheetah | Acinonyx jubatus 2 | Nature Picture Library |
| Cheetah | Acinonyx jubatus 3 (TOP) | Nature Picture Library |
| Cheetah | Acinonyx jubatus 4 | Nature Picture Library |
| Cheetah | Acinonyx jubatus 5 | Nature Picture Library |
| Cheetah | Acinonyx jubatus 6 | Biolib |
| Cheetah | Acinonyx jubatus 7 | Nature Picture Library |
| Caracal | Caracal caracal 1 | Nature Picture Library |
| Caracal | Caracal caracal 2 | Nature Picture Library |
| Caracal | Caracal caracal 3 | Nature Picture Library |
| Caracal | Caracal caracal 4 | Flickr |
| Caracal | Caracal caracal 5 | Flickr |
| Caracal | Caracal caracal 6 | Flickr |
| Caracal | Caracal caracal 7 | Flickr |
| Caracal | Caracal caracal 8 | Flickr |
| Caracal | Caracal caracal 9 | Flickr |
| Bay cat | Catopuma badia 1 | http://www.ourbreathingplanet.com/asian-golden-cat/ |
| Asian golden cat | Catopuma temminckii 1 | Nature Picture Library |
| Asian golden cat | Catopuma temminckii 2 | Biolib |
| Asian golden cat | Catopuma temminckii 3 | Flickr |
| Asian golden cat | Catopuma temminckii 4 | Flickr |
| Asian golden cat | Catopuma temminckii 5 | Flickr |
| Asian golden cat | Catopuma temminckii 6 | Flickr |
| Asian golden cat | Catopuma temminckii 7 | Flickr |
| Asian golden cat | Catopuma temminckii 8 | Flickr |
| Asian golden cat | Catopuma temminckii 9 | Flickr |
| Jungle cat | Felis chaus 1 | Biolib |
| Jungle cat | Felis chaus 2 | Biolib |
| Jungle cat | Felis chaus 3 | Biolib |
| Jungle cat | Felis chaus 4 | Biolib |
| Sand cat | Felis margarita 1 | Nature Picture Library |
| Sand cat | Felis margarita 2 | Arkive |
| Sand cat | Felis margarita 3 | Arkive |
| Sand cat | Felis margarita 4 | Flickr |
| Sand cat | Felis margarita 5 | Flickr |
| Sand cat | Felis margarita 6 | Flickr |
| Sand cat | Felis margarita 7 | Flickr |
| Sand cat | Felis margarita 8 | Nature Photo CZ |
| Sand cat | Felis margarita 9 | Wikimedia Commons |
| Back-footed cat | Felis nigripes S1 | Arkive |
| Back-footed cat | Felis nigripes 1 | Nature Picture Library |
| Back-footed cat | Felis nigripes 2 | Nature Picture Library |
| Back-footed cat | Felis nigripes 3 | Nature Picture Library |
| Back-footed cat | Felis nigripes 4 | Nature Picture Library |
| Back-footed cat | Felis nigripes 5 | Biolib |
| Wild cat | Felis silvestris 1 | Nature Picture Library |
| Wild cat | Felis silvestris 2 | Nature Picture Library |
| Wild cat | Felis silvestris 3 | Nature Picture Library |
| Wild cat | Felis silvestris 4 | Nature Picture Library |
| Wild cat | Felis silvestris 5 | Nature Picture Library |
| Wild cat | Felis silvestris 6 | Nature Picture Library |
| Wild cat | Felis silvestris 7 | Nature Picture Library |
| Wild cat | Felis silvestris 8 | Nature Picture Library |
| Wild cat | Felis silvestris 9 | Biolib |
| Jaguarundi | Puma yagouaroundi 1 | Nature Picture Library |
| Jaguarundi | Puma yagouaroundi 2 | Nature Picture Library |
| Jaguarundi | Puma yagouaroundi 3 | Biolib |
| Jaguarundi | Puma yagouaroundi 4 | Biolib |
| Jaguarundi | Puma yagouaroundi 5 | Arkive |
| Pampas cat | Leopardus colocolo 1 | Nature Picture Library |
| Pampas cat | Leopardus colocolo 2 | Arkive |
| Pampas cat | Leopardus colocolo 3 | Arkive |
| Pampas cat | Leopardus colocolo 4 | Arkive |
| Pampas cat | Leopardus colocolo 5 | Animals and Earth |
| Geoffry's cat | Leopardus geoffroyi (MELANISTIC) 1 | Nature Picture Library |
| Geoffry's cat | Leopardus geoffroyi 2 | Nature Picture Library |
| Geoffry's cat | Leopardus geoffroyi 3 | Biolib |
| Geoffry's cat | Leopardus geoffroyi 4 | Biolib |
| Geoffry's cat | Leopardus geoffroyi 5 | Biolib |
| Kodkod | Leopardus guigna 1 | Flickr |
| Kodkod | Leopardus guigna 2 | Flickr |
| Andean mountain cat | Leopardus jacobita 1 | Tumblr |
| Andean mountain cat | Leopardus jacobita 2 | Tumblr |
| Ocelot | Leopardus pardalis 1 | Nature Picture Library |
| Ocelot | Leopardus pardalis 2 | Nature Picture Library |
| Ocelot | Leopardus pardalis 3 | Nature Picture Library |
| Ocelot | Leopardus pardalis 4 | Nature Picture Library |
| Ocelot | Leopardus pardalis 5 | Nature Picture Library |
| Ocelot | Leopardus pardalis 6 | Nature Picture Library |
| Little spotted cat (oncilla) | Leopardus tigranus 1 | Nature Picture Library |
| Little spotted cat (oncilla) | Leopardus tigranus 2 | Flickr |
| Little spotted cat (oncilla) | Leopardus tigranus 3 | Flickr |
| Little spotted cat (oncilla) | Leopardus tigranus 4 | Flickr |
| Margay | Leopardus wiedii 1 | Nature Picture Library |
| Margay | Leopardus wiedii 2 | Nature Picture Library |
| Margay | Leopardus wiedii 3 | Flickr |
| Margay | Leopardus wiedii 4 | Flickr |
| Margay | Leopardus wiedii 5 | Flickr |
| Margay | Leopardus wiedii 6 | Encyclopedia of Life |
| Serval | Leptailurus serval 1 | Nature Picture Library |
| Serval | Leptailurus serval 2 | Encyclopedia of Life |
| Serval | Leptailurus serval 3 | Encyclopedia of Life |
| Serval | Leptailurus serval 4 | Encyclopedia of Life |
| Serval | Leptailurus serval 5 | Encyclopedia of Life |
| Canadian lynx | Lynx canadensis 1 | Nature Picture Library |
| Canadian lynx | Lynx canadensis 2 | Nature Picture Library |
| Canadian lynx | Lynx canadensis 3 | Nature Picture Library |
| Canadian lynx | Lynx canadensis 4 | Biolib |
| Canadian lynx | Lynx canadensis 5 | Flickr |
| Canadian lynx | Lynx canadensis 6 | Flickr |
| Eurasian lynx | Lynx lynx 1 | Nature Picture Library |
| Eurasian lynx | Lynx lynx 10 | Biolib |
| Eurasian lynx | Lynx lynx 2 | Nature Picture Library |
| Eurasian lynx | Lynx lynx 3 | Nature Picture Library |
| Eurasian lynx | Lynx lynx 4 | Nature Picture Library |
| Eurasian lynx | Lynx lynx 5 | Nature Picture Library |
| Eurasian lynx | Lynx lynx 6 | Biolib |
| Eurasian lynx | Lynx lynx 7 | Biolib |
| Eurasian lynx | Lynx lynx 8 | Biolib |
| Eurasian lynx | Lynx lynx 9 | Biolib |
| Iberian (Spanish) lynx | Lynx pardinus 1 | Nature Picture Library |
| Iberian (Spanish) lynx | Lynx pardinus 2 | Nature Picture Library |
| Iberian (Spanish) lynx | Lynx pardinus 3 | Biolib |
| Iberian (Spanish) lynx | Lynx pardinus 4 | Biolib |
| Iberian (Spanish) lynx | Lynx pardinus 5 | Nature Picture Library |
| Iberian (Spanish) lynx | Lynx pardinus 6 | Nature Picture Library |
| Bobcat | Lynx rufus 1 | Nature Picture Library |
| Bobcat | Lynx rufus 2 | Nature Picture Library |
| Bobcat | Lynx rufus 3 | Nature Picture Library |
| Bobcat | Lynx rufus 4 | Biolib |
| Bobcat | Lynx rufus 5 | Biolib |
| Bobcat | Lynx rufus 6 | Biolib |
| Bobcat | Lynx rufus 7 | Flickr |
| Bobcat | Lynx rufus 8 | Nature Picture Library |
| Diard's clouded leopard | Neofelis diardi 1 | Arkive |
| Diard's clouded leopard | Neofelis diardi S2 | Biolib |
| Diard's clouded leopard | Neofelis diardi S3 | Arkive |
| Clouded Leopard | Neofelis nebulosa 1 | Nature Picture Library |
| Clouded Leopard | Neofelis nebulosa 2 | Nature Picture Library |
| Clouded Leopard | Neofelis nebulosa 3 | Nature Picture Library |
| Clouded Leopard | Neofelis nebulosa 4 | Nature Picture Library |
| Clouded Leopard | Neofelis nebulosa 5 | Nature Picture Library |
| Clouded Leopard | Neofelis nebulosa 6 | Nature Picture Library |
| Pallas's Cat | Felis manul 1 | Nature Picture Library |
| Pallas's Cat | Felis manul 10 | Flickr |
| Pallas's Cat | Felis manul 2 | Nature Picture Library |
| Pallas's Cat | Felis manul 3 | Arkive |
| Pallas's Cat | Felis manul 4 | Arkive |
| Pallas's Cat | Felis manul 5 | Encyclopedia of Life |
| Pallas's Cat | Felis manul 6 | Encyclopedia of Life |
| Pallas's Cat | Felis manul 7 | Encyclopedia of Life |
| Pallas's Cat | Felis manul 8 | Flickr |
| Pallas's Cat | Felis manul 9 | Flickr |
| Lion | Panthera leo S1 Male | Nature Picture Library |
| Lion | Panthera leo S3 Female | Nature Picture Library |
| Lion | Panthera leo S4 Female | Nature Picture Library |
| Lion | Panthera leo S5 Male | Nature Picture Library |
| Lion | Panthera leo S6 Male | Nature Picture Library |
| Lion | Panthera leo S7 Female | Nature Picture Library |
| Lion | Panthera leo S9 Female | Nature Picture Library |
| Jaguar | Panthera onca S1 MELANISTIC | Nature Picture Library |
| Jaguar | Panthera onca S10 | Biolib |
| Jaguar | Panthera onca S2 | Nature Picture Library |
| Jaguar | Panthera onca S3 | Nature Picture Library |
| Jaguar | Panthera onca S4 | Nature Picture Library |
| Jaguar | Panthera onca S5 | Nature Picture Library |
| Jaguar | Panthera onca S7 | Nature Picture Library |
| Jaguar | Panthera onca S8 | Biolib |
| Jaguar | Panthera onca S9 (MELANISTIC) | Biolib |
| Leopard | Panthera pardus 1 | Nature Picture Library |
| Leopard | Panthera pardus 2 (MELANISTIC) | Nature Picture Library |
| Leopard | Panthera pardus 3 | Nature Picture Library |
| Leopard | Panthera pardus 4 | Nature Picture Library |
| Leopard | Panthera pardus 5 | Nature Picture Library |
| Leopard | Panthera pardus 6 | Nature Picture Library |
| Leopard | Panthera pardus 7 | Nature Picture Library |
| Leopard | Panthera pardus 8 | Nature Picture Library |
| Leopard | Panthera pardus 9 | Nature Picture Library |
| Tiger | Panthera tigris 1 | Nature Picture Library |
| Tiger | Panthera tigris 2 | Nature Picture Library |
| Tiger | Panthera tigris 3 | Nature Picture Library |
| Tiger | Panthera tigris 4 | Nature Picture Library |
| Tiger | Panthera tigris 5 | Nature Picture Library |
| Tiger | Panthera tigris 6 | Nature Picture Library |
| Tiger | Panthera tigris 7 | Nature Picture Library |
| Tiger | Panthera tigris 8 | Nature Picture Library |
| Tiger | Panthera tigris 9 | Nature Picture Library |
| Marbled Cat | Pardofelis marmorata 1 | Nature Picture Library |
| Marbled Cat | Pardofelis marmorata S3 | Arkive |
| Leopard Cat | Prionailurus bengalensis 1 | Nature Picture Library |
| Leopard Cat | Prionailurus bengalensis 2 | Arkive |
| Iriomote Cat | Prionailurus iriomotensis 1 | Animals and Earth |
| Iriomote Cat | Prionailurus iriomotensis S1 | Animals and Earth |
| Iriomote Cat | Prionailurus iriomotensis S3 | Nature Picture Library |
| Flat-headed Cat | Prionailurus planiceps 1 | Nature Picture Library |
| Flat-headed Cat | Prionailurus planiceps 2 | Flickr |
| Flat-headed Cat | Prionailurus planiceps 3 | Flickr |
| Flat-headed Cat | Prionailurus planiceps 4 | Arkive |
| Rusty-spotted Cat | Prionailurus rubiginosa 1 | Flickr |
| Rusty-spotted Cat | Prionailurus rubiginosa 2 | Flickr |
| Rusty-spotted Cat | Prionailurus rubiginosa 3 | Flickr |
| Fishing Cat | Prionailurus viverrinus 1 | Biolib |
| Fishing Cat | Prionailurus viverrinus 2 | Animals and Earth |
| Fishing Cat | Prionailurus viverrinus 3 | Flickr |
| African Golden Cat | Profelis aurata 1 | Nature Picture Library |
| African Golden Cat | Profelis aurata S1 | Arkive |
| Cougar, Puma, Mtn. Lion | Puma concolor 1 | Nature Picture Library |
| Cougar, Puma, Mtn. Lion | Puma concolor 2 | Nature Picture Library |
| Cougar, Puma, Mtn. Lion | Puma concolor 3 | Nature Picture Library |
| Cougar, Puma, Mtn. Lion | Puma concolor 4 | Nature Picture Library |
| Cougar, Puma, Mtn. Lion | Puma concolor 5 | Flickr |
| Cougar, Puma, Mtn. Lion | Puma concolor 6 | Flickr |
| Cougar, Puma, Mtn. Lion | Puma concolor 7 | Flickr |
| Cougar, Puma, Mtn. Lion | Puma concolor 8 | Flickr |
| Snow Leopard | Uncia uncia 1 | Nature Picture Library |
| Snow Leopard | Uncia uncia 2 | Nature Picture Library |
| Snow Leopard | Uncia uncia 3 | Nature Picture Library |
| Snow Leopard | Uncia uncia 4 | Nature Picture Library |
| Snow Leopard | Uncia uncia 5 | Nature Picture Library |
| Snow Leopard | Uncia uncia 6 | Nature Picture Library |
| Marsh Mongoose (Water Mongoose) | Atilax paludinosus 1 | Nature Picture Library |
| Marsh Mongoose (Water Mongoose) | Atilax paludinosus 2 | Arkive |
| Marsh Mongoose (Water Mongoose) | Atilax paludinosus 3 | Arkive |
| Marsh Mongoose (Water Mongoose) | Atilax paludinosus 4 | Arkive |
| Marsh Mongoose (Water Mongoose) | Atilax paludinosus 5 | Biolib |
| Bushy-tailed Mongoose | Bdeogale crassicauda S1 | Wikipedia |
| Black-footed Mongoose | Bdeogale nigripes S1 | http://s3.amazonaws.com/mongabay-images/13/1017.2.-B.-nigripes-_LB-Panthera-(small). |
| Alexander's kusimanse | Crossarchus alexandri S1 | http://www.zooclub.ru/attach/wild/723.jpg, |
| Long-nosed Cusimanse | Crossarchus obscurus 1 | Nature Picture Library |
| Long-nosed Cusimanse | Crossarchus obscurus 2 | Biolib |
| Long-nosed Cusimanse | Crossarchus obscurus 3 | Biolib |
| Yellow Mongoose | Cynictis penicillata 1 | Nature Picture Library |
| Yellow Mongoose | Cynictis penicillata 2 | Nature Picture Library |
| Yellow Mongoose | Cynictis penicillata 10 | Biolib |
| Yellow Mongoose | Cynictis penicillata 3 | Nature Picture Library |
| Yellow Mongoose | Cynictis penicillata 4 | Biolib |
| Yellow Mongoose | Cynictis penicillata 5 | Nature Picture Library |
| Yellow Mongoose | Cynictis penicillata 6 | Nature Picture Library |
| Yellow Mongoose | Cynictis penicillata 7 | Nature Picture Library |
| Yellow Mongoose | Cynictis penicillata 8 | Nature Picture Library |
| Yellow Mongoose | Cynictis penicillata 9 | Nature Picture Library |
| Cape gray mongoose | Galerella pulverulenta 1 | Nature Picture Library |
| Slender Mongoose | Galerella sanguinea 1 | Nature Picture Library |
| Slender Mongoose | Galerella sanguinea 2 | Biolib |
| Ethiopian Dwarf Mongoose | Helogale parvula 1 | Nature Picture Library |
| Ethiopian Dwarf Mongoose | Helogale parvula 2 | Nature Picture Library |
| Ethiopian Dwarf Mongoose | Helogale parvula 3 | Biolib |
| Ethiopian Dwarf Mongoose | Helogale parvula 4 | Biolib |
| Ethiopian Dwarf Mongoose | Helogale parvula 5 | Biolib |
| Ethiopian Dwarf Mongoose | Helogale parvula 6 | Nature Picture Library |
| Ethiopian Dwarf Mongoose | Helogale parvula 7 | Nature Picture Library |
| Ethiopian Dwarf Mongoose | Helogale parvula 8 | Nature Picture Library |
| (Common) Dwarf Mongoose | Hemigalus derbyanus S1 | Encyclopedia of Life |
| (Common) Dwarf Mongoose | Hemigalus derbyanus S4 | Nature Picture Library |
| Small Asian Mongoose | Herpestes auropunctatus S1 | Nature Picture Library |
| Short-tailed mongoose | Herpestes brachyurus S1 | http://www.leszoosdanslemonde.com/gal2data/albums/mammiferes/carnivora/herpestidae/herpestes_brachyurus/petaling_jaya_herpestes_brachyurus_2009_1.jpg, |
| Indian Gray Mongoose | Herpestes edwardsi 1 | Nature Picture Library |
| Indian Gray Mongoose | Herpestes edwardsi 2 | Flickr |
| Indian Gray Mongoose | Herpestes edwardsi 3 | Flickr |
| Indian brown mongoose | Herpestes fuscus S1 | Encyclopedia of Life |
| Indian brown mongoose | Herpestes fuscus S2 | Encyclopedia of Life |
| Egyptian Mongoose | Herpestes ichneumon 1 (RT) | Arkive |
| Egyptian Mongoose | Herpestes ichneumon 2 | Animals and Earth |
| Egyptian Mongoose | Herpestes ichneumon 3 | Flickr |
| Egyptian Mongoose | Herpestes ichneumon 4 | Flickr |
| Long-nosed Mongoose | Herpestes naso S1 | http://img2.wikia.nocookie.net/__cb20130727084754/animalofthewould/images/b/bf/Long-Nosed_Mongoose.jpg, |
| Ruddy mongoose | Herpestes smithii S1 | Nature Picture Library |
| Ruddy mongoose | Herpestes smithii S3 | Nature Picture Library |
| Crab-Eating Mongoose | Herpestes urva 1 | Flickr |
| Crab-Eating Mongoose | Herpestes urva 2 | Flickr |
| Stripe-necked mongoose | Herpestes vitticollis 1 | Arkive |
| Stripe-necked mongoose | Herpestes vitticollis S1 | Flickr |
| Stripe-necked mongoose | Herpestes vitticollis S4 | Flickr |
| Stripe-necked mongoose | Herpestes vitticollis S5 | Flickr |
| Stripe-necked mongoose | Herpestes vitticollis S6 | Arkive |
| White-tailed Mongoose | Ichneumia albicauda 1 | Biolib |
| White-tailed Mongoose | Ichneumia albicauda S2 | Arkive |
| White-tailed Mongoose | Ichneumia albicauda S6 | Nature Picture Library |
| Liberian Mongoose | Liberiictis kuhni S1 | Arkive |
| Banded Mongoose | Mungos mungo 1 | Arkive |
| Banded Mongoose | Mungos mungo 2 | Biolib |
| Banded Mongoose | Mungos mungo 3 | Flickr |
| Banded Mongoose | Mungos mungo 4 | Flickr |
| Banded Mongoose | Mungos mungo 5 | Nature Picture Library |
| Gray Meerkat (Selous's Mongoose) | Paracynictis selousi S1 | http://www.planet-mammiferes.org/drupal/en/node/40?indice2=Photos%2FCarniv%2FViverrid%2FParaSel4.jpg |
| Meller's Mongoose | Rhynchogale melleri 1 | Encyclopedia of Life |
| Suricate (Slender-tailed Meerkat) | Suricata suricatta 1 | Nature Picture Library |
| Suricate (Slender-tailed Meerkat) | Suricata suricatta 2 | Nature Picture Library |
| Suricate (Slender-tailed Meerkat) | Suricata suricatta 3 | Biolib |
| Suricate (Slender-tailed Meerkat) | Suricata suricatta 4 | Biolib |
| Suricate (Slender-tailed Meerkat) | Suricata suricatta 5 | Biolib |
| Spotted Hyaena | Crocuta crocuta 1 | Wikimedia Commons |
| Spotted Hyaena | Crocuta crocuta 2 | Nature Picture Library |
| Spotted Hyaena | Crocuta crocuta 3 | Nature Picture Library |
| Spotted Hyaena | Crocuta crocuta 4 | Nature Picture Library |
| Spotted Hyaena | Crocuta crocuta 5 | Nature Picture Library |
| Spotted Hyaena | Crocuta crocuta 6 | Nature Picture Library |
| Spotted Hyaena | Crocuta crocuta 7 (LT) | Nature Picture Library |
| Striped Hyaena | Hyaena hyaena 1 | Nature Picture Library |
| Striped Hyaena | Hyaena hyaena 2 | Nature Picture Library |
| Striped Hyaena | Hyaena hyaena 3 | Nature Picture Library |
| Striped Hyaena | Hyaena hyaena 4 | Flickr |
| Brown hyaena | Hyaena brunnea 1 | Nature Picture Library |
| Brown hyaena | Hyaena brunnea 2 | Arkive |
| Aardwolf | Proteles cristata 1 | Nature Picture Library |
| Aardwolf | Proteles cristata 2 | Arkive |
| Aardwolf | Proteles cristata 3 | Flickr |
| Aardwolf | Proteles cristata 4 | Flickr |
| Molina's hog nosed skunk | Conepatus chinga S1 | Encyclopedia of Life |
| Molina's hog nosed skunk | Conepatus chinga S2 | Encyclopedia of Life |
| Western hog nosed skunk | Conepatus mesoleucus S1 | Encyclopedia of Life |
| Hooded Skunk | Mephitis macroura S2 | Encyclopedia of Life |
| Hooded Skunk | Mephitis macroura S1 | Arkive |
| Striped Skunk | Mephitis mephitis 1 S | Nature Picture Library |
| Striped Skunk | Mephitis mephitis 3 S | Nature Picture Library |
| Striped Skunk | Mephitis mephitis 5 S | Arkive |
| Striped Skunk | Mephitis mephitis 7 S | Biolib |
| Striped Skunk | Mephitis mephitis 9 S | Biolib |
| Western Spotted Skunk | Spilogale gracilis 1 | Encyclopedia of Life |
| Western Spotted Skunk | Spilogale gracilis 2 | Encyclopedia of Life |
| Eastern Spotted Skunk | Spilogale putorius 2 S | Nature Picture Library |
| Eastern Spotted Skunk | Spilogale putorius 3 S | Encyclopedia of Life |
| African Clawless Otter | Aonyx capensis 1 | Flickr |
| African Clawless Otter | Aonyx capensis 2 | Flickr |
| African Clawless Otter | Aonyx capensis 3 | Flickr |
| Oriental/Asian/Indian Small-clawed Otter | Aonyx cinereus S2 | Biolib |
| Oriental/Asian/Indian Small-clawed Otter | Aonyx cinereus S4 | Arkive |
| Hog Badger | Arctonyx collaris 1 | Flickr |
| Tayra | Eira barbara 1 | Nature Picture Library |
| Tayra | Eira barbara 2 | Nature Picture Library |
| Tayra | Eira barbara 3 | Biolib |
| Tayra | Eira barbara 4 | Biolib |
| Tayra | Eira barbara 5 | Biolib |
| Tayra | Eira barbara 6 | Nature Picture Library |
| Tayra | Eira barbara 7 | Biolib |
| Sea Otter | Enhydra lutris 1 | Nature Picture Library |
| Sea Otter | Enhydra lutris 2 | Nature Picture Library |
| Sea Otter | Enhydra lutris 3 | Nature Picture Library |
| Sea Otter | Enhydra lutris 4 | Nature Picture Library |
| Sea Otter | Enhydra lutris 5 | Nature Picture Library |
| Lesser Grison | Galictis cuja 1 | Arkive |
| Lesser Grison | Galictis cuja 2 | Biolib |
| Greater Grison | Galictis vittata 1 | Nature Picture Library |
| Greater Grison | Galictis vittata 2 | Arkive |
| Wolverine | Gulo gulo 1 | Nature Picture Library |
| Wolverine | Gulo gulo 2 | Nature Picture Library |
| Wolverine | Gulo gulo 3 | Nature Picture Library |
| Wolverine | Gulo gulo 4 | Biolib |
| Wolverine | Gulo gulo 5 | Arkive |
| Wolverine | Gulo gulo 6 | Biolib |
| Spotted-necked Otter | Hydrictis maculicollis 1 | Nature Picture Library |
| Spotted-necked Otter | Hydrictis maculicollis 2 | Arkive |
| North African Striped Weasel | Ictonyx libycus 1 S | Encyclopedia of Life |
| North African Striped Weasel | Ictonyx libycus 2 S | Biolib |
| North African Striped Weasel | Ictonyx libycus 3 S | Biolib |
| North African Striped Weasel | Ictonyx libycus 4 S | Biolib |
| Zorilla | Ictonyx striatus 1 | Arkive |
| Zorilla | Ictonyx striatus 2 | Arkive |
| Zorilla | Ictonyx striatus 3 | Biolib |
| (North American) River Otter | Lontra canadensis 1 S | Animals and Earth |
| (North American) River Otter | Lontra canadensis 2 S | Arkive |
| (North American) River Otter | Lontra canadensis 4 S | Nature Picture Library |
| (North American) River Otter | Lontra canadensis 5 S | Nature Picture Library |
| (North American) River Otter | Lontra canadensis 6 S | Nature Picture Library |
| Marine Otter | Lontra felina 1 | Nature Picture Library |
| Marine Otter | Lontra felina 2 | Arkive |
| Neotropical Otter | Lontra longicaudis 1 | Arkive |
| Southern river otter | Lontra provocax 1 | Arkive |
| Eurasian Otter | Lutra lutra 1 | Nature Picture Library |
| Eurasian Otter | Lutra lutra 2 | Arkive |
| Eurasian Otter | Lutra lutra 3 | Arkive |
| Eurasian Otter | Lutra lutra 4 | Nature Picture Library |
| Eurasian Otter | Lutra lutra 5 | Nature Picture Library |
| Hairy-nosed Otter | Lutra sumatrana S1 | Arkive |
| Smooth-coated Otter | Lutrogale perspicillata 1 | Arkive |
| Smooth-coated Otter | Lutrogale perspicillata 2 | Arkive |
| Smooth-coated Otter | Lutrogale perspicillata 3 | Arkive |
| American Marten | Martes americana 1 | Nature Picture Library |
| American Marten | Martes americana 2 | Nature Picture Library |
| American Marten | Martes americana 3 | Nature Picture Library |
| American Marten | Martes americana 4 | Nature Picture Library |
| American Marten | Martes americana 5 | Nature Picture Library |
| American Marten | Martes americana 6 | Nature Picture Library |
| American Marten | Martes americana 7 | Arkive |
| Yellow-throated Marten | Martes flavigula 1 | Biolib |
| Yellow-throated Marten | Martes flavigula 2 | Biolib |
| Yellow-throated Marten | Martes flavigula 3 | Biolib |
| Yellow-throated Marten | Martes flavigula 4 | Biolib |
| Yellow-throated Marten | Martes flavigula 5 | Biolib |
| Beech Marten | Martes foina 1 | Nature Picture Library |
| Beech Marten | Martes foina 2 | Nature Picture Library |
| Beech Marten | Martes foina 3 | Nature Picture Library |
| Beech Marten | Martes foina 4 | Nature Picture Library |
| Beech Marten | Martes foina 5 | Nature Picture Library |
| Beech Marten | Martes foina 6 | Nature Picture Library |
| Pine Marten | Martes martes 1 | Nature Picture Library |
| Pine Marten | Martes martes 2 | Nature Picture Library |
| Pine Marten | Martes martes 3 | Nature Picture Library |
| Pine Marten | Martes martes 4 | Nature Picture Library |
| Pine Marten | Martes martes 5 | Nature Picture Library |
| Pine Marten | Martes martes 6 | Nature Picture Library |
| Pine Marten | Martes martes 7 | Nature Picture Library |
| Japanese Marten | Martes melampus S1 | Nature Picture Library |
| Japanese Marten | Martes melampus 1 | Flickr |
| Fisher | Martes pennanti 1 | Nature Picture Library |
| Fisher | Martes pennanti 2 | Nature Picture Library |
| Sable | Martes zibellina 1 S | Nature Picture Library |
| Sable | Martes zibellina 2 S | Nature Picture Library |
| Sable | Martes zibellina 3 S | Encyclopedia of Life |
| Sable | Martes zibellina 4 S | Animals and Earth |
| Japanese Badger | Meles anakuma 1 | Arkive |
| European Badger | Meles meles 1 | Nature Picture Library |
| European Badger | Meles meles 2 | Nature Picture Library |
| European Badger | Meles meles 3 | Nature Picture Library |
| European Badger | Meles meles 4 | Nature Picture Library |
| European Badger | Meles meles 5 | Nature Picture Library |
| Honey Badger, Ratel | Mellivora capensis 1 | Nature Picture Library |
| Honey Badger, Ratel | Mellivora capensis 2 | Nature Picture Library |
| Honey Badger, Ratel | Mellivora capensis 3 | Biolib |
| Chinese Ferret Badger | Melogale moschata 1 | Nature Picture Library |
| Chinese Ferret Badger | Melogale moschata 2 | Biolib |
| Burmese Ferret-badger | Melogale personata 1 S | Birmese zonnedas |
| Tropical Weasel | Mustela africana 1 S | http://www.eluniversoanimal.com/otros%20animales/mustelidos/mustelaafricana.jpg, |
| Mountain Weasel | Mustela altaica 1 | Nature Picture Library |
| Mountain Weasel | Mustela altaica 2 | Arkive |
| Ermine, Stoat | Mustela erminea 1 Summer | Nature Picture Library |
| Ermine, Stoat | Mustela erminea 2 Summer | Nature Picture Library |
| Ermine, Stoat | Mustela erminea 3 Winter | Nature Picture Library |
| Ermine, Stoat | Mustela erminea 4 Winter | Nature Picture Library |
| Ermine, Stoat | Mustela erminea 7 I SIDE | Nature Picture Library |
| Ermine, Stoat | Mustela erminea 8 I SIDE | Nature Picture Library |
| Steppe Polecat | Mustela eversmanii 1 | Nature Picture Library |
| Long-tailed Weasel | Mustela frenata 1 S | Encyclopedia of Life |
| Long-tailed Weasel | Mustela frenata 2 S | Nature Picture Library |
| Long-tailed Weasel | Mustela frenata 3 W Side | Arkive |
| Long-tailed Weasel | Mustela frenata T1 SIDE | Flickr |
| Japanese Weasel | 12 Mustela itatsi S | https://www.pinterest.com/pin/123919427219325336/ |
| Japanese Weasel | Mustela itatsi 1 S | Wikipedia |
| Japanese Weasel | Mustela itatsi 3 S | Wikipedia |
| European Mink | Mustela lutreola 1 | Nature Picture Library |
| European Mink | Mustela lutreola 2 | Nature Picture Library |
| European Mink | Mustela lutreola 3 | Nature Picture Library |
| European Mink | Mustela lutreola 4 | Nature Picture Library |
| European Mink | Mustela lutreola 5 | Nature Picture Library |
| Black-footed Ferret | Mustela nigripes 1 | Nature Picture Library |
| Black-footed Ferret | Mustela nigripes 2 | Nature Picture Library |
| Black-footed Ferret | Mustela nigripes 3 | Biolib |
| Black-footed Ferret | Mustela nigripes 4 | Nature Picture Library |
| Least Weasel | Mustela nivalis 1 S | Nature Picture Library |
| Least Weasel | Mustela nivalis 2 S | Nature Picture Library |
| Least Weasel | Mustela nivalis 3 S | Nature Picture Library |
| Least Weasel | Mustela nivalis 4 S | Nature Picture Library |
| Least Weasel | Mustela nivalis 5 S | Nature Picture Library |
| Least Weasel | Mustela nivalis T1 SIDE | Flickriver |
| Least Weasel | Mustela nivalis T2 SIDE | Flickr |
| Least Weasel | Mustela nivalis W1 SIDE | Flickr |
| Least Weasel | Mustela nivalis W2 SIDE | Flickr |
| Least Weasel | Mustela nivalis W3 SIDE | http://www.inaturalist.org/photos/639306 |
| Least Weasel | Mustela nivalis W4 SIDE | Flickr |
| Malaysian Weasel | Mustela nudipes S1 | http://www.planet-mammiferes.org/Photos/Carniv/Mustelid/MustNud1.jpg, |
| Malaysian Weasel | Mustela nudipes S2 | http://www.all-about-ferrets.com/images/MalayanWeasel.jpg, |
| European Polecat | Mustela putorius 1 | Nature Picture Library |
| European Polecat | Mustela putorius 2 | Nature Picture Library |
| European Polecat | Mustela putorius 3 | Nature Picture Library |
| European Polecat | Mustela putorius 4 | Nature Picture Library |
| European Polecat | Mustela putorius 5 | Nature Picture Library |
| Siberian Weasel | Mustela sibirica 1 | Arkive |
| Siberian Weasel | Mustela sibirica 2 | Arkive |
| Siberian Weasel | Mustela sibirica 3 | Biolib |
| Siberian Weasel | Mustela sibirica 4 | Biolib |
| Stripe-backed Weasel | Mustela strigidorsa S1 | Encyclopedia of Life |
| Indoesian Stink Badger | Mydaus javanensis S1 | http://www.safeproject.net/animal-sightings/malay-badger-mydaus-javanensis/ |
| Indoesian Stink Badger | Mydaus javanensis S2 | http://1.bp.blogspot.com/-VWs7O5XAZDE/UJXocXnmrqI/AAAAAAAAAk8/2XJBHXh5O74/s1600/hspring+(1).JPG, |
| Palawan Stink Badger | Mydaus marchei 1 | Arkive |
| American Mink | Neovison vison 1 | Nature Picture Library |
| American Mink | Neovison vison 2 | Nature Picture Library |
| American Mink | Neovison vison 3 | Arkive |
| American Mink | Neovison vison 4 | Arkive |
| African Striped Weasel | Poecilogale albinucha 1 | Arkive |
| African Striped Weasel | Poecilogale albinucha 2 | Nature Picture Library |
| Giant Otter | Pteronura brasiliensis 1 | Nature Picture Library |
| Giant Otter | Pteronura brasiliensis 2 | Nature Picture Library |
| Giant Otter | Pteronura brasiliensis 3 | Nature Picture Library |
| Giant Otter | Pteronura brasiliensis 4 | Nature Picture Library |
| American Badger | Taxidea taxus 1 | Nature Picture Library |
| American Badger | Taxidea taxus 2 | Nature Picture Library |
| American Badger | Taxidea taxus 3 | Nature Picture Library |
| American Badger | Taxidea taxus 4 | Nature Picture Library |
| American Badger | Taxidea taxus 5 | Nature Picture Library |
| Marbled Polecat | Vormela peregusna 1 | Nature Picture Library |
| Marbled Polecat | Vormela peregusna 2 | Nature Picture Library |
| Marbled Polecat | Vormela peregusna 3 | Biolib |
| Marbled Polecat | Vormela peregusna 4 | Biolib |
| Marbled Polecat | Vormela peregusna 5 | Biolib |
| African Palm Civet | Nandinia binotata S1 | Arkive |
| African Palm Civet | Nandinia binotata S3 | Nature Picture Library |
| Eastern Lowland Olingo | Bassaricyon alleni S1 | Nature Picture Library |
| Olingos (Northern Olingo) | Bassaricyon gabbii S1 | Arkive |
| Olingos (Northern Olingo) | Bassaricyon gabbii S2 | Arkive |
| Olingos (Northern Olingo) | Bassaricyon gabbii S4 | Zoochat |
| Olingos (Northern Olingo) | Bassaricyon gabbii S5 | Zoochat |
| Ringtail | Bassariscus astutus 1 | Nature Picture Library |
| Ringtail | Bassariscus astutus 2 | Biolib |
| Cacomistle | Bassariscus sumichrasti 1 | Arkive |
| Cacomistle | Bassariscus sumichrasti 2 | Arkive |
| White-nosed Coati | Nasua narica S1 | Nature Picture Library |
| White-nosed Coati | Nasua narica S2 | Nature Picture Library |
| White-nosed Coati | Nasua narica S3 | Nature Picture Library |
| White-nosed Coati | Nasua narica S4 | Encyclopedia of Life |
| White-nosed Coati | Nasua narica S7 | Animal Diversity Web |
| Brown-nosed Coati | Nasua nasua S10 | Encyclopedia of Life |
| Brown-nosed Coati | Nasua nasua S2 | Biolib |
| Brown-nosed Coati | Nasua nasua S4 | Biolib |
| Brown-nosed Coati | Nasua nasua S9 | Encyclopedia of Life |
| Brown-nosed Coati | Nasua nasua S1 | Biolib |
| Mountain Coati | Nasuella olivacea S1 | Arkive |
| Kinkajou | Potos flavus 1 | Biolib |
| Kinkajou | Potos flavus 2 | Biolib |
| Kinkajou | Potos flavus 3 | Nature Picture Library |
| Crab-eating Racoon | Procyon cancrivorus 1 | Nature Picture Library |
| Crab-eating Racoon | Procyon cancrivorus 2 | Arkive |
| Racoon | Procyon lotor 1 | Nature Picture Library |
| Racoon | Procyon lotor 2 | Nature Picture Library |
| Racoon | Procyon lotor 3 | Nature Picture Library |
| Racoon | Procyon lotor 4 | Nature Picture Library |
| Racoon | Procyon lotor 5 | Nature Picture Library |
| Racoon | Procyon lotor 6 | Nature Picture Library |
| Ethiopian Dwarf Mongoose | Helogale hirtula S1 | Arkive |
| Binturong | Arctictis binturong 1 | Nature Picture Library |
| Binturong | Arctictis binturong 2 | Nature Picture Library |
| Binturong | Arctictis binturong 3 | Arkive |
| Binturong | Arctictis binturong 4 | Arkive |
| Binturong | Arctictis binturong 5 | Biolib |
| Small-toothed or Three-striped Palm Civet | Arctogalidia trivirgata 1 | Nature Picture Library |
| Small-toothed or Three-striped Palm Civet | Arctogalidia trivirgata 2 | Nature Picture Library |
| Owston's Palm Civet | Chrotogale owstoni S1 | Biolib |
| African Civet | Civettictis civetta 1 | Nature Picture Library |
| African Civet | Civettictis civetta 2 | Nature Picture Library |
| African Civet | Civettictis civetta 3 | Nature Picture Library |
| African Civet | Civettictis civetta 4 | Arkive |
| African Civet | Civettictis civetta 5 | Biolib |
| African Civet | Civettictis civetta 6 | Biolib |
| African Civet | Civettictis civetta 7 | Biolib |
| Otter Civet | Cynogale bennettii S1 | http://photos.mongabay.com/j/ConCaSa5.568.JPG, |
| Angolan Genet | Genetta angolensis S2 | Carnivora Forum |
| Genet | Genetta genetta S1 | Biolib |
| Genet | Genetta genetta S2 | Biolib |
| Genet | Genetta genetta S4 | Encyclopedia of Life |
| Genet | Genetta genetta S5 | Nature Picture Library |
| Genet | Genetta genetta S6 | Carnivora Forum |
| Johnston's genet | Genetta johnstoni S1 | http://lis-upmc.snv.jussieu.fr/xper2/basesHtml/genettes_en/web/images/Genjoh_Ivory_Coast.jpg, |
| Rusty-spotted Genet | Genetta maculata S1 | Nature Picture Library |
| Pardine Genet | Genetta pardina S1 | http://zooinstitutes.com/animals/11397.jpg, |
| Servaline Genet | Genetta servalina 1 | Nature Picture Library |
| Haussa Genet | Genetta thierryi 1 | Biolib |
| Cape Genet | Genetta tigrina 1 | Arkive |
| Cape Genet | Genetta tigrina 2 | Arkive |
| Cape Genet | Genetta tigrina 3 | Arkive |
| Cape Genet | Genetta tigrina 4 | Arkive |
| Cape Genet | Genetta tigrina 5 | Arkive |
| Cape Genet | Genetta tigrina 6 | Arkive |
| Masked Palm Civet | Paguma larvata 1 | Nature Picture Library |
| Masked Palm Civet | Paguma larvata 2 | Nature Picture Library |
| Masked Palm Civet | Paguma larvata 3 | Biolib |
| Palm Civet | Paradoxurus hermaphroditus S1 | Nature Picture Library |
| Palm Civet | Paradoxurus hermaphroditus S2 | Biolib |
| Palm Civet | Paradoxurus hermaphroditus S3 | Encyclopedia of Life |
| Palm Civet | Paradoxurus hermaphroditus S4 | Biolib |
| Palm Civet | Paradoxurus hermaphroditus S5 | Biolib |
| Palm Civet | Paradoxurus hermaphroditus S6 | Encyclopedia of Life |
| Brown Palm Civet | Paradoxurus jerdoni 1 | Arkive |
| Brown Palm Civet | Paradoxurus jerdoni 2 | Encyclopedia of Life |
| Banded Linsang | Prionodon linsang S2 | Arkive |
| Banded Linsang | Prionodon linsang S1 | Arkive |
| Spotted Linsang | Prionodon pardicolor S1 | Arkive |
| Malayan Civet | Viverra tangalunga 1 | Nature Picture Library |
| Malayan Civet | Viverra tangalunga 2 | Arkive |
| Large Indian Civet | Viverra zibetha 1 | Arkive |
| Small Indian Civet - Lesser Oriental Civet - Rasse | Viverricula indica 1 | Arkive |

| **Bear Faces** | | |
| --- | --- | --- |
| **Species Common name** | **Photo** | **Source** |
| Giant panda | Ailuropoda melanoleuca 1 | Animals and Earth |
| Giant panda | Ailuropoda melanoleuca 2 | Biolib |
| Giant panda | Ailuropoda melanoleuca 3 | Encyclopedia of Life |
| Giant panda | Ailuropoda melanoleuca 4 | Flickr |
| Giant panda | Ailuropoda melanoleuca 5 | Flickr |
| Giant panda | Ailuropoda melanoleuca 6 | Flickr |
| Giant panda | Ailuropoda melanoleuca 7 | Nature Picture Library |
| Giant panda | Ailuropoda melanoleuca 8 | Nature Picture Library |
| Quinling panda | Ailuropoda melanoleuca quinling 1 | Carnivora Forum |
| Quinling panda | Ailuropoda melanoleuca quinling 2 | Minden Pictures |
| Sun Bear | Helarctos malayanus euryspulus 1 | Biolib |
| Sun Bear | Helarctos malayanus euryspulus 2 | Encyclopedia of Life |
| Sun Bear | Helarctos malayanus euryspulus 3 | Nature Picture Library |
| Sun Bear | Helarctos malayanus euryspulus 4 | Nature Picture Library |
| Sloth Bear | Melursus ursinus inornatus 1 | Biolib |
| Sloth Bear | Melursus ursinus ursinus 1 | Biolib |
| Sloth Bear | Melursus ursinus ursinus 2 | Biolib |
| Sloth Bear | Melursus ursinus ursinus 3 | Biolib |
| Andean bear | Tremarctos ornatus 1 | Nature Picture Library |
| Andean bear | Tremarctos ornatus 2 F | Nature Picture Library |
| Andean bear | Tremarctos ornatus 3 | Nature Picture Library |
| Andean bear | Tremarctos ornatus 4 | Nature Picture Library |
| Andean bear | Tremarctos ornatus 5 | Nature Picture Library |
| Black bear | Ursinus americanus vancouveri 1 | Nature Picture Library |
| Black bear | Ursinus americanus vancouveri 2 | Nature Picture Library |
| Black bear | Ursus americanus altifrontalis 1 | Nature Picture Library |
| Black bear | Ursus americanus altifrontalis 2 | Flickr |
| Black bear | Ursus americanus amblyceps 1 | Biolib |
| Black bear | Ursus americanus amblyceps 2 | Encyclopedia of Life |
| Black bear | Ursus americanus amblyceps 3 | Flickr |
| Black bear | Ursus americanus americanus 1 | Nature Picture Library |
| Black bear | Ursus americanus americanus 2 | Nature Picture Library |
| Black bear | Ursus americanus americanus 5 | Nature Picture Library |
| Black bear | Ursus americanus californiensis 1 | Flickr |
| Black bear | Ursus americanus carlottae 1 | Flickr |
| Black bear | Ursus americanus cinnamonum 1 | Nature Picture Library |
| Black bear | Ursus americanus cinnamonum 2 | Nature Picture Library |
| Black bear | Ursus americanus cinnamonum 3 | Flickr |
| Black bear | Ursus americanus cinnamonum 4 | Flickr |
| Black bear | Ursus americanus cinnamonum 5 (NPL UNNAMED) | Nature Picture Library |
| Black bear | Ursus americanus emonsii 1 | Flickr |
| Black bear | Ursus americanus eremicus 1 | Nature Picture Library |
| Black bear | Ursus americanus eremicus 2 | Flickr |
| Black bear | Ursus americanus eremicus 3 | Flickr |
| Black bear | Ursus americanus floridanus 1 | Flickr |
| Black bear | Ursus americanus floridanus 2 | Flickr |
| Black bear | Ursus americanus floridanus 3 | Flickr |
| Black bear | Ursus americanus floridanus 4 | Bears of the World |
| Black bear | Ursus americanus floridanus 5 | Bears of the World |
| Black bear | Ursus americanus floridanus 6 | floridanature.org |
| Black bear | Ursus americanus hamiltoni 1 | http://www.canadatrophyhunting.com/Destinations/Pine_Ridge_Lodge/ |
| Black bear | Ursus americanus hamiltoni 2 | http://nfsales.no-ip.biz/whitefeatherlodge/bear.html |
| Black bear | Ursus americanus hamiltoni 3 | http://nfsales.no-ip.biz/whitefeatherlodge/bear.html |
| Black bear | Ursus americanus kermodei 1 W | Nature Picture Library |
| Black bear | Ursus americanus kermodei 2 W | Nature Picture Library |
| Black bear | Ursus americanus kermodei 3 B | Nature Picture Library |
| Black bear | Ursus americanus kermodei 4 W | Nature Picture Library |
| Black bear | Ursus americanus kermodei 5 W | Nature Picture Library |
| Black bear | Ursus americanus luteolus 1 | http://www.wlf.louisiana.gov/american-black-bear |
| Black bear | Ursus americanus luteolus 2 | https://www.lakeforest.edu/academics/programs/environmental/courses/seniorseminar/2015/students/mone.php |
| Black bear | Ursus americanus luteolus 3 | Biolib |
| Black bear | Ursus americanus luteolus 4 | Fish and Wildlife Services https://www.fws.gov/endangered/map/ESA_success_stories/LA/LA_story1/ |
| Black bear | Ursus americanus luteolus 5 | Fish and Wildlife Services https://www.fws.gov/lafayette/pdc/ |
| Black bear | Ursus americanus perniger 1 | https://www.inaturalist.org/observations/2655412 |
| Black bear | Ursus americanus perniger 2 | http://www.wildnatureimages.com/Black%20Bear%20Sow%20H.htm |
| Black bear | Ursus americanus perniger 3 | http://peninsulaclarion.com/outdoors/2012-03-16/new-drawing-system-for-black-bear-baiting-permits |
| Black bear | Ursus americanus perniger 4 | http://www.wildnatureimages.com/Black_Bear_Pictures.htm |
| Black bear | Ursus americanus pugnax 1 | http://www.thetelegram.com/News/Regional/2014-10-09/article-3897562/Black-bears-reported-near-populated-areas-of-western-Newfoundland/1 |
| Black bear | Ursus americanus pugnax 2 | http://www.hunting-newfoundland.com/black-bear-pictures-123-pictures.htm |
| Brown bear | Ursus actos collaris 1 | Bears of the World |
| Brown bear | Ursus actos collaris 2 | Bears of the World |
| Brown bear | Ursus arctos arctos 1 | Nature Picture Library |
| Brown bear | Ursus arctos arctos 2 | Nature Picture Library |
| Brown bear | Ursus arctos arctos 3 | Nature Picture Library |
| Brown bear | Ursus arctos arctos 4 | Nature Picture Library |
| Brown bear | Ursus arctos arctos 5 | Nature Picture Library |
| Brown bear | Ursus arctos arctos 6 | Nature Picture Library |
| Brown bear | Ursus arctos arctos 7 | Nature Picture Library |
| Brown bear | Ursus arctos arctos 8 | Biolib |
| Brown bear | Ursus arctos beringianus 1 | Nature Picture Library |
| Brown bear | Ursus arctos beringianus 2 | Nature Picture Library |
| Brown bear | Ursus arctos beringianus 3 | Nature Picture Library |
| Brown bear | Ursus arctos beringianus 5 | Nature Picture Library |
| Brown bear | Ursus arctos beringianus 8 | Biolib |
| Brown bear | Ursus arctos dalli 1 | http://www.planet-mammiferes.org/drupal/en/node/40?indice2=Photos%2FCarniv%2FUrsides%2FBrunAla1.jpg |
| Brown bear | Ursus arctos dalli 2 | http://www.planet-mammiferes.org/drupal/en/node/39?indice=Ursus+arctos+dalli |
| Brown bear | Ursus arctos gobiensis 1 | Nature Picture Library |
| Brown bear | Ursus arctos gyas 1 | alamy stock photo |
| Brown bear | Ursus arctos horriblis 1 | Nature Picture Library |
| Brown bear | Ursus arctos horriblis 3 | Nature Picture Library |
| Brown bear | Ursus arctos horriblis 4 | Nature Picture Library |
| Brown bear | Ursus arctos horriblis 5 | Nature Picture Library |
| Brown bear | Ursus arctos horriblis 6 | Nature Picture Library |
| Brown bear | Ursus arctos horriblis 7 | Nature Picture Library |
| Brown bear | Ursus arctos horriblis 8 | Nature Picture Library |
| Brown bear | Ursus arctos horriblis 9 | Nature Picture Library |
| Brown bear | Ursus arctos isabellinus 1 | http://zooinstitutes.com/zoosrating/animal.asp?name=839 |
| Brown bear | Ursus arctos isabellinus 2 | shutterstock |
| Brown bear | Ursus arctos isabellinus 3 BOTTOM BEAR | http://www.zoochat.com/859/himalayan-brown-bear-chengdu-zoo-2012-a-271725/ |
| Brown bear | Ursus arctos isabellinus 3 TOP BEAR | http://www.zoochat.com/859/himalayan-brown-bear-chengdu-zoo-2012-a-271725/ |
| Brown bear | Ursus arctos isabellinus 4 | Biolib |
| Brown bear | Ursus arctos lasiotus 1 DARK | http://zooinstitutes.com/animal.asp?name=2412 |
| Brown bear | Ursus arctos lasiotus 2 DARK | http://zooinstitutes.com/animal.asp?name=2412 |
| Brown bear | Ursus arctos lasiotus 3 DARK | Zooinstitutes |
| Brown bear | Ursus arctos lasiotus 4 LIGHT | National Geographic |
| Brown bear | Ursus arctos middendorffi 1 | Nature Picture Library |
| Brown bear | Ursus arctos middendorffi 2 | Nature Picture Library |
| Brown bear | Ursus arctos middendorffi 3 | Nature Picture Library |
| Brown bear | Ursus arctos middendorffi 4 | Nature Picture Library |
| Brown bear | Ursus arctos middendorffi 6 | Nature Picture Library |
| Brown bear | Ursus arctos middendorffi 8 | Biolib |
| Brown bear | Ursus arctos pruinosis 1 LEFT | Zoochat http://www.zoochat.com/859/tibetan-blue-bears-ursus-arctos-pruinosus-348075/ |
| Brown bear | Ursus arctos pruinosis 1 RIGHT | Zoochat http://www.zoochat.com/859/tibetan-blue-bears-ursus-arctos-pruinosus-348075/ |
| Brown bear | Ursus arctos pruinosis 2 | Bears of the World |
| Brown bear | Ursus arctos syriacus 1 | Biolib |
| Brown bear | Ursus arctos syriacus 2 | Bears of the World |
| Brown bear | Ursus arctos syriacus 3 LEFT | Bears of the World |
| Asiatic black bear | Ursus thibetanus formosanus 1 | Bears of the World |
| Asiatic black bear | Ursus thibetanus formosanus 3 | Tree of Life Web Project http://tolweb.org/Ursus_thibetanus/123668 |
| Asiatic black bear | Ursus thibetanus gedrosianus 1 | Wikipedia |
| Asiatic black bear | Ursus thibetanus gedrosianus 2 | iran-airrifle http://www.iran-airrifle.com/forum/printthread.php?tid=752&page=2 (other places online as well) |
| Asiatic black bear | Ursus thibetanus gedrosianus 4 | wildlife nature_knoji_com https://wildlife-nature.knoji.com/the-endangered-bear-species-of-the-world/ |
| Asiatic black bear | Ursus thibetanus japonicus 2 | Bears of the World |
| Asiatic black bear | Ursus thibetanus laniger 1 | Bears of the World |
| Asiatic black bear | Ursus thibetanus laniger 2 | Bears of the World |
| Asiatic black bear | Ursus thibetanus laniger 3 | Bears of the World |
| Asiatic black bear | Ursus thibetanus laniger 4 | Manimalworld_net |
| Asiatic black bear | Ursus thibetanus laniger 5 | Manimalworld_net |
| Asiatic black bear | Ursus thibetanus laniger 6 | Manimalworld_net |
| Asiatic black bear | Ursus thibetanus mupinensis 2 | Biolib |
| Asiatic black bear | Ursus thibetanus ussuriscus 1 | Biolib |
| Asiatic black bear | Ursus thibetanus ussuriscus 2 | Zooinstitutes |
| Polar bear | Ursus maritimus 1 | Nature Picture Library |
| Polar bear | Ursus maritimus 2 | Nature Picture Library |
| Polar bear | Ursus maritimus 3 | Nature Picture Library |
| Polar bear | Ursus maritimus 4 | Nature Picture Library |
| Polar bear | Ursus maritimus 5 | Nature Picture Library |
| Polar bear | Ursus maritimus 6 | Nature Picture Library |
| Polar bear | Ursus maritimus 7 | Nature Picture Library |

Table S2. Literature MH used to check independent variables.

**Books**

Wilson, D.E., and Mittermeier, R.A. 2009. *The handbook of mammals of the world, vol 1. Carnivores*. Lynx edicions, Conservation International, IUCN.

Macdonald, D. (Editor) 1984. *The encyclopedia of mammals*. Facts on File, New York.

Hall, E.R. 1981. *The mammals of North America*. Volume II. Second edition. Blackburn Press, New Jersey.

**Journals**

Balaguera-Reina, S.A., Cepeda, A., Zarrate-Charry, D., and Gonzalez-Maya, J.F. 2009. The state of knowledge of Western Mountain Coati Nasuella olivacea in Colombia, and extent of occurrence in the Northern Andes. *Small Carnivore Conservation,* 41, 35–40.

Cossíos, E.D. 2010. Lycalopex sechurae (Carnivora: Canidae). *Mammalian Species* 42, 1-6

**Websites**

<http://www.animalinfo.org/species/carnivor/genecris.htm>

<http://eol.org/>

<http://www.inaturalist.org/taxa/40151-Mammalia>

<http://pagediscover.com/www/tanzaniamammals.org.html>

<http://www.iucnredlist.org/>

http://animaldiversity.org/

Table S3. (a) Mean lengths and (b) depths (in mms) of hairs of 8 species of ursids. Bold denotes that the giant panda significantly (p < 0.05) longer or thicker hair than the species in that column using a t-test with unequal variances; underlined denotes the giant panda has significantly shorter or thinner hair. If N = 1, it could not be tested. Superscript denotes sample size if different from that at the head of the table.

Giant Malayan Sloth Andean Black Brown Polar Asiatic

panda sun bear bear bear bear bear bear bear

___________________________________________________________________

N=15 3 3 1 2 11 2 4

___________________________________________________________________

(a) LENGTH OF HAIR

Spine

39.0 15.0 210.7 76.0 74.5 65.3 50.5 55.5

Neck

38.3 17.7 205.7 75.0 74.0 72.2 58.5 92.8

Chest

73.8 7.02 65.0 30.0 38.0 54.9 38.0 16.0

Shoulder

48.9 15.0 193.3 77.0 72.5 73.5 41.5 65.8

Lower shoulder

64.9 19.0 150.0 83.0 72.0 78.5 41.0 65.8

Upper forelimb

57.1 11.3 133.3 40.0 53.5 75.4 42.5 39.0

Lower forelimb

45.511 7.8 105.0 38.0 31.5 41.510 37.5 28.0

Back

42.0 16.2 159.3 65.0 73.0 69.5 51.0 59.8

Side

46.8 18.0 140.0 90.0 80.5 71.5 56.5 54.8

Belly

69.1 23.7 136.7 105.0 116.5 89.6 95.0 45.8

Flank

46.0 16.0 131.0 55.0 64.5 80.5 59.0 47.3

Tail

55.711 26.5 110.01 27.0 77.5 60.38 83.5 36.03

Tail tip

72.910 31.02 125.01 42.0 78.5 61.39 91.0 35.7 3

Upper hindlimb

54.4 14.7 133.3 40.0 59.5 76.9 56.5 37.5

Lower hindlimb

47.111 11.2 136.0 45.0 38.01 55.310 55.0 28.03

(b) DEPTH OF HAIR

___________________________________________________________________

Spine

28.7 5.0 78.7 30.0 48.0 23.8 29.0 17.8

Neck

26.5 5.3 97.7 35.0 44.0 37.5 30.0 42.8

Chest

14.3 2.5 20.3 16.0 20.5 15.2 19.0 4.8

Shoulder

28.7 5.7 61.7 26.0 45.0 32.8 25.0 28.8

Lower shoulder

33.3 4.7 51.0 22.0 45.0 30.8 25.0 26.3

Upper forelimb

33.7 2.8 50.0 17.0 32.5 30.5 20.5 19.8

Lower forelimb

23.811 2.0 28.3 9.0 15.0 12.910 15.0 9.1

Back

29.3 3.8 60.0 25.0 50.0 25.1 31.5 17.3

Side

27.0 4.0 42.7 24.0 40.0 35.3 26.5 20.8

Belly

16.0 4.7 19.3 25.0 23.5 19.3 17.5 9.5

Flank

36.9 6.0 44.3 15.0 32.5 35.4 27.5 19.3

Tail

35.011 7.02 40.01  10.0 36.0 28.99 41.0 13.0

Tail tip

29.010 13.52 40.01 15.0 34.0 28.29 35.0 14.0 3

Upper hindlimb

26.7 3.8 43.7 13.0 30.0 34.9 33.0 15.5

Lower hindlimb

23.311 2.3 33.7 15.0 14.01 21.110 20.5 11.33

___________________________________________________________________

Table S4. Associations between hair length and depths and mean annual average temperatures, fur color taken from M2, and their interaction across eight species of ursid (see table S2) (N = 8, dfs = 3, 4, each *λ = 0* throughout).

Length Depth

t-test p-value t-test p-value

_______________________________________________________________

*Spine*

Temperature -0.215 0.841 -0.027 0.980

Fur color (side view 1) 0.209 0.845 0.601 0.955

Temp X fur color 0.407 0.705 0.096 0.928

*Neck*

Temperature -0.277 0.795 -0.102 0.924

Fur color (side view 2) 0.274 0.798 0.258 0.809

Temp X fur color 0.444 0.680 0.198 0.853

*Chest*

Temperature -1.039 0.358 -0.459 0.670

Fur color (side view 3) 0.828 0.454 0.324 0.763

Temp X fur color 1.265 0.275 0.239 0.823

*Shoulder*

Temperature 0.688 0.529 0.356 0.740

Fur color (side view 4) -0.666 0.542 -0.266 0.803

Temp X fur color -0.627 0.565 -0.380 0.723

*Lower shoulder*

Temperature 0.597 0.583 0.156 0.884

Fur color (side view 5) -0.518 0.632 -0.056 0.958

Temp X fur color -0.579 0.594 -0.206 0.847

*Upper forelimb*

Temperature 0.514 0.634 0.288 0.787

Fur color (side view 6) -0.496 0.646 -0.251 0.814

Temp X fur color -0.512 0.634 -0.301 0.779

*Lower forelimb*

Temperature -1.706 0.163 -2.079 0.106

Fur color (side view 7) 1.766 0.152 2.153 0.098

Temp X fur color 1.688 0.167 2.053 0.109

*Back*

Temperature -0.134 0.990 -0.014 0.990

Fur color (side view 8) 0.102 0.924 0.102 0.924

Temp X fur color -0.095 0.929 -0.095 0.929

*Side*

Temperature -0.150 0.888 -1.165 0.877

Fur color (side view 9) -0.458 0.671 0.529 0.625

Temp X fur color 0.143 0.893 -0.576 0.596

*Belly*

Temperature -0.319 0.766 0.008 0.994

Fur color (side view 10) 0.324 0.762 0.523 0.623

Temp X fur color 0.085 0.936 -0.441 0.682

*Flank*

Temperature - 0.212 0.842 0.499 0.644

Fur color (side view 9) 0.242 0.821 -0.274 0.798

Temp X fur color 0.165 0.877 -0.639 0.558

*Upper hindlimb*

Temperature 0.650 0.551 0.508 0.638

Fur color (side view 6) -0.650 0.551 -0.523 0.629

Temp X fur color -0.648 0.553 -0.526 0.627

*Lower hindlimb*

Temperature 0.596 0.584 0.467 0.665

Fur color (side view 7) -0.493 0.648 -0.360 0.737

Temp X fur color -0.631 0.562 -0.505 0.640

_______________________________________________________________

Table S5. Giant panda hair measures in mms (N = 14 pelts).

LENGTHS DEPTHS

White Black White Black

__________________________________________________________

Spine 39.0 28.7

Neck 38.3 26.5

Chest* 73.8 14.3

Shoulder 48.9 28.7

Low Shoulder 64.9 33.3

Upper Foreleg 57.1 33.7

Lower Foreleg 45.5 23.8

Back 42.0 29.3

Side 46.8 27.0

Belly * 69.1 16.0

Flank 46.0 36.9

Tail* 55.7 35.0

Tailtip* 72.9 29.0

Upper Hindleg 54.5 26.7

Lower Hindleg 47.1 23.3

*_________________________________________________________*

Mean 51.2 56.0 28.6 26.3

Mean no tail 46.9 56.0 27.4 26.3

* brownish

Table S6. Associations between eye markings and activity patterns (each structured as yes/no). (M1, N = 185, dfs = 1, 183, M2, N = 179, dfs = 1, 177 for all except nocturnal that was N = 187, dfs = 1, 186 for both methods).

Method 1 Method 2

t-test p-value t-test p-value

_______________________________________________________________

*Diurnal λ = 0.543* *λ = 0.665*

-0.026 0.979 0.026 0.980

*Cathemeral λ = 0.542* *λ = 0.666*

0.780 0.436 0.020 0.984

*Crepuscular λ = 0.534* *λ = 0.664*

-0.711 0.478 -0.307 0.759

*Nocturnal λ = 0.519* *λ = 0.637*

-0.519 0.604 0.162 0.872

_______________________________________________________________

Table S7. Associations between five measures of contrasting coloration and average snow cover and shadiness. A: overall body contrast (see Methods) derived from an average of the differences between 6 adjacent body regions in Figure 1a (N = 177, dfs = 1, 175 for both analyses). B: B: average difference in contrast between 7 adjacent body regions in Figure 1b (left), (N = 186, dfs = 1, 184 for all remaining analyses in this table). C: maximum difference between any of these two adjacent body regions in Figure 1b. D: average difference in contrast between the very darkest and very lightest portions of pelage between adjacent body regions in Figure 1b. E: maximum difference in contrast between the very darkest and very lightest portions of pelage between adjacent body regions in Figure 1b (see Methods).

Average snow Shadiness

t-test p-value t-test p-value

_______________________________________________________________

*A λ = 0.577* *λ = 0.589*

-1.130 0.260 0.124 0.902

*B λ = 0.809* *λ = 0.799*

-1.192 0.235 -0.868 0.386

*C λ = 0.641 λ = 0.671*

-1.817 0.071 0.304 0.761

*D λ = 0.677* *λ = 0.686*

-0.555 0.580 -0.317 0.752

*E λ = 0.148* *λ = 0.148*

-1.341 0.182 0.848 0.398

__________________________________________________________

Figure S1. Wolverine (http://bit.ly/2dUaKOP)


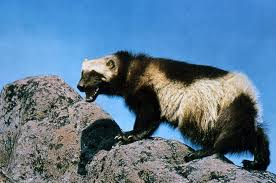

Supplement: arx008_suppl_Supplementary_Material.docx [file arx008_suppl_Supplementary_Material.docx]
